# Supplementary material for: The Whereabouts of Flower Visitors: Contrasting Land-Use Preferences Revealed by a Country-Wide Survey Based on Citizen Science
Source: PubMed Central journal article supplement (PMC3446938; doi:10.1371/journal.pone.0045822), 2012-09-19
Supplement: pone.0045822.s003.pdf [file pone.0045822.s003.pdf]

**Table S1. The description of the 60 frequent taxa.**

| Taxa code | Taxa identity                      | Species list                                                                                                                                                                                                                                                                                                                                                                                                                                                                                                                                                                                                                                                                                                                                                                                                                                                                                                                                                                                                                                                                                                     | Nb. of species included | Taxonomic resolution | Order      | Family        | Nb. Of pictures | Affinity with land-use types |       |        |
|-----------|------------------------------------|------------------------------------------------------------------------------------------------------------------------------------------------------------------------------------------------------------------------------------------------------------------------------------------------------------------------------------------------------------------------------------------------------------------------------------------------------------------------------------------------------------------------------------------------------------------------------------------------------------------------------------------------------------------------------------------------------------------------------------------------------------------------------------------------------------------------------------------------------------------------------------------------------------------------------------------------------------------------------------------------------------------------------------------------------------------------------------------------------------------|-------------------------|----------------------|------------|---------------|-----------------|------------------------------|-------|--------|
|           |                                    |                                                                                                                                                                                                                                                                                                                                                                                                                                                                                                                                                                                                                                                                                                                                                                                                                                                                                                                                                                                                                                                                                                                  |                         |                      |            |               |                 | Urb.                         | Agr.  | Nat.   |
| C 1       | The banded blister beetles         | <i>Hycleus polymorphus</i> Pallas, <i>Mylabris variabilis</i> Pallas                                                                                                                                                                                                                                                                                                                                                                                                                                                                                                                                                                                                                                                                                                                                                                                                                                                                                                                                                                                                                                             | 2                       | 4                    | Coleoptera | Meloidae      | 20              | -15.74*                      | 5.51  | 10.71* |
| C 2       | The sap beetles                    | Nitidulidae spp.                                                                                                                                                                                                                                                                                                                                                                                                                                                                                                                                                                                                                                                                                                                                                                                                                                                                                                                                                                                                                                                                                                 | 153                     | 2                    | Coleoptera | Nitidulidae   | 52              | -13.38*                      | 8.98* | 3.43   |
| C 3       | The spotted longhorn               | <i>Rutpela maculata</i> Poda                                                                                                                                                                                                                                                                                                                                                                                                                                                                                                                                                                                                                                                                                                                                                                                                                                                                                                                                                                                                                                                                                     | 1                       | 7                    | Coleoptera | Cerambycidae  | 21              | -13.36*                      | -1.28 | 14.09* |
| C 4       | The Pachyta and other longhorns    | <i>Acmaeops marginatus</i> Fabricius, <i>Acmaeops pratensis</i> Laicharting, <i>Acmaeops septentrionis</i> Thomson, <i>Anastrangalia dubia</i> Scopoli, <i>Anastrangalia reyi</i> Heyden, <i>Anastrangalia sanguinolenta</i> Linnaeus, <i>Anisarthron barbipes</i> Schrank, <i>Anisorus quercus</i> (female) Goeze, <i>Brachyta interrogationis</i> Linnaeus, <i>Cortodera femorata</i> Fabricius, <i>Cortodera humeralis</i> Schaller, <i>Grammoptera abdominalis</i> Stephens, <i>Grammoptera ruficornis</i> Fabricius, <i>Deilus fugax</i> Olivier, <i>Leptura aethiops</i> Poda, <i>Pachyta quadrimaculata</i> Linnaeus, <i>Pachytodes cerambyciformis</i> Pic, <i>Pachytodes erraticus</i> Dalman, <i>Paracorymbia hybrida</i> Rey, <i>Paracorymbia maculicornis</i> De Geer, <i>Pedostrangalia pubescens</i> Fabricius, <i>Pseudovadonia livida</i> Fabricius, <i>Stenocorus meridianus</i> Linnaeus, <i>Stenurella nigra</i> Linnaeus, <i>Stictoleptura fontenayi</i> Mulsant, <i>Stictoleptura rubra</i> (male) Linnaeus, <i>Stictoleptura scutellata</i> Fabricius, <i>Tetropium castaneum</i> Linnaeus | 28                      | 4                    | Coleoptera | Cerambycidae  | 41              | -10.98*                      | -5.01 | 16.58* |
| C 5       | The seven-spot ladybird            | <i>Coccinella septempunctata</i> Linnaeus                                                                                                                                                                                                                                                                                                                                                                                                                                                                                                                                                                                                                                                                                                                                                                                                                                                                                                                                                                                                                                                                        | 1                       | 7                    | Coleoptera | Coccinellidae | 80              | -10.57*                      | 9.58* | 1.64   |
| C 6       | The other leaf beetles             | <i>Chrysolina</i> spp. (except <i>C. americana</i> Linnaeus), <i>Cryptocephalus</i> spp. (except <i>C. rugicollis</i> G.A.Olivier, <i>C. trimaculatus</i> Rossi and <i>C. vittatus</i> Fabricius), <i>Entomoscelis</i> spp., <i>Oreina</i> spp.                                                                                                                                                                                                                                                                                                                                                                                                                                                                                                                                                                                                                                                                                                                                                                                                                                                                  | 161                     | 4                    | Coleoptera | Chrysomelidae | 35              | -9.87                        | 5.62  | 5.57   |
| C 7       | The tumbling flower beetles        | Mordellidae spp.                                                                                                                                                                                                                                                                                                                                                                                                                                                                                                                                                                                                                                                                                                                                                                                                                                                                                                                                                                                                                                                                                                 | 81                      | 2                    | Coleoptera | Mordellidae   | 59              | -9.4*                        | 4.28  | 5.79*  |
| C 8       | The metallic chafers with patterns | <i>Cetonia aurata</i> Linnaeus, <i>Cetonia carthami</i> Gory & Percheron, <i>Protaetia cuprea</i> Fabricius, <i>Protaetia fieberi</i> Kraatz, <i>Protaetia lugubris</i> Herbst                                                                                                                                                                                                                                                                                                                                                                                                                                                                                                                                                                                                                                                                                                                                                                                                                                                                                                                                   | 5                       | 4                    | Coleoptera | Cetoniidae    | 65              | -9.05*                       | 4.2   | 5.45*  |
| C 9       | The dark silky chafers             | <i>Tropinota hirta</i> Poda, <i>Tropinota squalida</i> Lindberg                                                                                                                                                                                                                                                                                                                                                                                                                                                                                                                                                                                                                                                                                                                                                                                                                                                                                                                                                                                                                                                  | 2                       | 5                    | Coleoptera | Cetoniidae    | 19              | -7.82                        | 2.31  | 6.66   |
| C 10      | The tawny longhorn                 | <i>Paracorymbia fulva</i> De Geer                                                                                                                                                                                                                                                                                                                                                                                                                                                                                                                                                                                                                                                                                                                                                                                                                                                                                                                                                                                                                                                                                | 1                       | 7                    | Coleoptera | Cerambycidae  | 28              | -7.18*                       | -0.18 | 7.81*  |
| C 11      | The white-spotted rose beetle      | <i>Oxythyrea funesta</i> Poda                                                                                                                                                                                                                                                                                                                                                                                                                                                                                                                                                                                                                                                                                                                                                                                                                                                                                                                                                                                                                                                                                    | 1                       | 7                    | Coleoptera | Cetoniidae    | 83              | -4.36                        | 4.2   | 0.5    |

|      |                                |                                                                                                                                                                                                                                                                                                                                                                                                                                                                                                                                               |     |   |            |               |     |         |        |         |
|------|--------------------------------|-----------------------------------------------------------------------------------------------------------------------------------------------------------------------------------------------------------------------------------------------------------------------------------------------------------------------------------------------------------------------------------------------------------------------------------------------------------------------------------------------------------------------------------------------|-----|---|------------|---------------|-----|---------|--------|---------|
| C 12 | The black dasytids             | <i>Aplocnemus impressus</i> Marsham, <i>Aplocnemus nigricornis</i> Fabricius, <i>Dasytes niger</i> Linnaeus, <i>Dasytes plumbeus</i> Müller, <i>Dasytes obscurus</i> Gyllenhal, <i>Enicopus hirtus</i> Linnaeus                                                                                                                                                                                                                                                                                                                               | 6   | 4 | Coleoptera | Dasytidae     | 22  | -1.14   | 2.6    | -0.55   |
| C 13 | The pollen-feeding beetles     | <i>Anogcodes ferrugineus</i> Schrank, <i>Anogcodes rufiventris</i> Scopoli, <i>Anogcodes ustulatus</i> Scopoli, <i>Oedemera femoralis</i> Olivier, <i>Oedemera femorata</i> Scopoli, <i>Oedemera lateralis</i> Gebler, <i>Oedemera lurida</i> Marsham, <i>Oedemera monticola</i> Vihla, <i>Oedemera nobilis</i> Scopoli, <i>Oedemera flavipes</i> Fabricius, <i>Oedemera podagrariae</i> Linnaeus, <i>Oedemera pthysica</i> Scopoli, <i>Oedemera simplex</i> Linnaeus, <i>Oedemera tristis</i> W. Schmidt, <i>Oedemera virescens</i> Linnaeus | 14  | 4 | Coleoptera | Oedemeridae   | 205 | 1.58    | 1.71   | -2.59   |
| C 14 | The skin beetles               | Dermestidae spp.                                                                                                                                                                                                                                                                                                                                                                                                                                                                                                                              | 81  | 4 | Coleoptera | Dermestidae   | 45  | 5.27    | 8.84*  | -13.63* |
| C 15 | The ladybirds                  | Coccinellidae spp. (except <i>Coccinella septempunctata</i> Linnaeus)                                                                                                                                                                                                                                                                                                                                                                                                                                                                         | 110 | 3 | Coleoptera | Coccinellidae | 63  | 8.34*   | -3.3   | -4.93   |
| D 1  |                                | <i>Rhingia campestris</i> Meigen, <i>Rhingia borealis</i> Ringdahl, <i>Rhingia rostrata</i> Linnaeus                                                                                                                                                                                                                                                                                                                                                                                                                                          | 3   | 6 | Diptera    | Syrphidae     | 30  | -19.37* | 10.64* | 9.83*   |
| D 2  | The tawny tachinids (1)        | <i>Nowickia</i> spp., <i>Tachina fera</i> Linnaeus, <i>Tachina magnicornis</i> Zetterstedt                                                                                                                                                                                                                                                                                                                                                                                                                                                    | 7   | 4 | Diptera    | Tachinidae    | 92  | -15.71* | 9*     | 7.05*   |
| D 3  | The face fly (male)            | <i>Musca autumnalis</i> De Geer (male)                                                                                                                                                                                                                                                                                                                                                                                                                                                                                                        | 1   | 7 | Diptera    | Muscidae      | 33  | -13.74* | 11.84* | 3.04    |
| D 4  | The empidids                   | Empididae spp.                                                                                                                                                                                                                                                                                                                                                                                                                                                                                                                                | 208 | 2 | Diptera    | Empididae     | 57  | -13.16* | 6.97*  | 7.19*   |
| D 5  | The tawny tachinids (2)        | <i>Ectophasia</i> spp., <i>Phasia hemiptera</i> Fabricius                                                                                                                                                                                                                                                                                                                                                                                                                                                                                     | 4   | 3 | Diptera    | Tachinidae    | 47  | -11.59* | 5.53   | 5.2     |
| D 6  | The thin hoverflies            | <i>Epistrophella</i> spp., <i>Melangyna</i> spp., <i>Melanostoma</i> spp., <i>Meligramma</i> spp., <i>Meliscaeva</i> spp., <i>Neoascia</i> spp., <i>Platycheirus</i> spp., <i>Sphaerophoria</i> spp. (except <i>S. scripta</i> Linnaeus), <i>Syrirta</i> spp. (except <i>S. pipiens</i> Linnaeus)                                                                                                                                                                                                                                             | 72  | 4 | Diptera    | Syrphidae     | 53  | -11.07* | 6.18   | 5.87*   |
| D 7  | The black scavenger flies      | Sepsidae spp.                                                                                                                                                                                                                                                                                                                                                                                                                                                                                                                                 | 24  | 2 | Diptera    | Sepsidae      | 37  | -9.82*  | 5.43   | 4.99    |
| D 8  | The other bee flies            | <i>Bombylius</i> spp., <i>Systoechus</i> spp.                                                                                                                                                                                                                                                                                                                                                                                                                                                                                                 | 27  | 3 | Diptera    | Bombyliidae   | 54  | -9.82*  | 5.04   | 5.15    |
| D 9  | The cylindrical tachinids      | <i>Cylindromyia</i> spp.                                                                                                                                                                                                                                                                                                                                                                                                                                                                                                                      | 12  | 5 | Diptera    | Tachinidae    | 28  | -4.57   | 3.22   | 1.69    |
| D 10 | The other thick-headed flies   | <i>Melanosoma</i> spp., <i>Physocephala</i> spp., <i>Sicus</i> spp., <i>Thecophora</i> spp., <i>Zodion</i> spp.                                                                                                                                                                                                                                                                                                                                                                                                                               | 21  | 4 | Diptera    | Conopidae     | 30  | -4.42   | -2.47  | 7.23    |
| D 11 | The other Eristalis hoverflies | <i>Eristalis</i> spp. (except <i>E. intricaria</i> Linnaeus)                                                                                                                                                                                                                                                                                                                                                                                                                                                                                  | 13  | 4 | Diptera    | Syrphidae     | 339 | -2.93   | 1.6    | 1.33    |
| D 12 | The Syrphus hoverflies         | <i>Syrphus</i> spp.                                                                                                                                                                                                                                                                                                                                                                                                                                                                                                                           | 5   | 5 | Diptera    | Syrphidae     | 74  | -2.9    | 1.39   | 1.37    |
| D 13 | The marmalade hoverfly         | <i>Episyrphus balteatus</i> De Geer                                                                                                                                                                                                                                                                                                                                                                                                                                                                                                           | 1   | 7 | Diptera    | Syrphidae     | 184 | -1.77   | 3.33   | -1.74   |

|      |                                                     |                                                                                                                                                                                                                                                                                                                                                                                                                                                                                                                                                      |     |   |             |                |     |         |       |        |
|------|-----------------------------------------------------|------------------------------------------------------------------------------------------------------------------------------------------------------------------------------------------------------------------------------------------------------------------------------------------------------------------------------------------------------------------------------------------------------------------------------------------------------------------------------------------------------------------------------------------------------|-----|---|-------------|----------------|-----|---------|-------|--------|
| D 14 | The other hoverflies                                | <i>Dasysyrphus</i> spp., <i>Didea</i> spp., <i>Epistrophe</i> spp., <i>Eupeodes</i> spp., <i>Parasyrphus</i> spp., <i>Scaeva</i> spp., <i>Sericomyia</i> spp., <i>Temnostoma</i> spp. (except <i>T. bombylans</i> Fabricius and <i>T. vespiforme</i> Linnaeus), <i>Xanthogramma</i> spp.                                                                                                                                                                                                                                                             | 54  | 4 | Diptera     | Syrphidae      | 116 | 0.5     | 0.82  | -1.63  |
| D 15 | The feather holder hoverfly                         | <i>Sphaerophoria scripta</i> Linnaeus                                                                                                                                                                                                                                                                                                                                                                                                                                                                                                                | 1   | 7 | Diptera     | Syrphidae      | 292 | 1.1     | 2.74  | -3.22* |
| D 16 | The thick-legged hoverfly                           | <i>Syritta pipiens</i> Linnaeus                                                                                                                                                                                                                                                                                                                                                                                                                                                                                                                      | 1   | 7 | Diptera     | Syrphidae      | 116 | 1.92    | 4.5   | -5.94* |
| D 17 | The Myathropa florea hoverfly                       | <i>Myathropa florea</i> Linnaeus                                                                                                                                                                                                                                                                                                                                                                                                                                                                                                                     | 1   | 7 | Diptera     | Syrphidae      | 64  | 2.28    | -0.61 | -0.98  |
| D 18 | The dark stripped flies                             | <i>Sarcophaga</i> spp.                                                                                                                                                                                                                                                                                                                                                                                                                                                                                                                               | 84  | 5 | Diptera     | Sarcophagidae  | 148 | 3.25    | 0.44  | -3.61  |
| H 1  | The black and yellow tenthredinids                  | <i>Allantus viennensis</i> Schrank, <i>Macrophya montana</i> Scopoli (female), <i>Tenthredo</i> spp. (except <i>T. colon</i> Klug, <i>T. crassa</i> Scopoli, <i>T. livida</i> Linnaeus, <i>T. velox</i> Fabricius, <i>T. solitaria</i> Scopoli, <i>T. ferruginea</i> Schrank, <i>T. koehleri</i> Klug, <i>T. bifasciata</i> O. F. Müller, <i>T. caucasica</i> Eversmann, <i>T. neobesa</i> Zombori, <i>T. campestris</i> Linnaeus, <i>T. mesomela</i> Linnaeus, <i>T. mioceras</i> Enslin, <i>T. obsoleta</i> Klug, <i>T. olivacea</i> Klug)         | 47  | 4 | Hymenoptera | Tenthredinidae | 26  | -10.14* | 1.56  | 9.64*  |
| H 2  | The ants                                            | Formicidae spp.                                                                                                                                                                                                                                                                                                                                                                                                                                                                                                                                      | 218 | 2 | Hymenoptera | Formicidae     | 141 | -3.93   | -3.22 | 6.8*   |
| H 3  | The classic wasps                                   | <i>Dolichovespula</i> spp., <i>Polistes</i> spp., <i>Vespula</i> spp. (except <i>V. rufa</i> Linnaeus)                                                                                                                                                                                                                                                                                                                                                                                                                                               | 18  | 4 | Hymenoptera | Vespidae       | 159 | -2.9    | 2.23  | 0.54   |
| H 4  | The halictids (Halictus and Lasioglossum) (males)   | <i>Halictus</i> spp. (males), <i>Lasioglossum</i> spp. (males)                                                                                                                                                                                                                                                                                                                                                                                                                                                                                       | 119 | 3 | Hymenoptera | Halictidae     | 187 | -1.57   | 4.95* | -2.69  |
| H 5  | The other bumble bees                               | <i>Bombus confusus</i> Schenck, <i>Bombus hortorum</i> Linnaeus, <i>Bombus hypnorum</i> Linnaeus, <i>Bombus jonellus</i> Kirby, <i>Bombus lapidarius</i> Linnaeus, <i>Bombus lucorum</i> Linnaeus, <i>Bombus magnus</i> Vogt, <i>Bombus pomorum</i> Panzer, <i>Bombus pratorum</i> Linnaeus, <i>Bombus ruderarius</i> Müller, <i>Bombus ruderatus</i> Fabricius, <i>Bombus rupestris</i> Fabricius, <i>Bombus soroensis</i> Fabricius, <i>Bombus subterraneus</i> Linnaeus, <i>Bombus terrestris</i> Linnaeus, <i>Bombus wurflenii</i> Radoszkowski. | 16  | 6 | Hymenoptera | Apidae         | 605 | -0.1    | 1.4   | -1.29  |
| H 6  | The mason wasps                                     | <i>Discoelius</i> spp., <i>Eumenes</i> spp., <i>Ischnogasteroides picteti</i> Saussure, <i>Katamenes arbustorum</i> Panzer, <i>Leptochilus</i> spp.                                                                                                                                                                                                                                                                                                                                                                                                  | 22  | 3 | Hymenoptera | Vespidae       | 61  | 0.67    | 1.43  | -2.72  |
| H 7  | The honey bee                                       | <i>Apis mellifera</i> Linnaeus                                                                                                                                                                                                                                                                                                                                                                                                                                                                                                                       | 1   | 7 | Hymenoptera | Apidae         | 601 | 1.31    | 0.37  | -1.94* |
| H 8  | The tawny bumble bee                                | <i>Bombus humilis</i> Illiger, <i>Bombus muscorum</i> Linnaeus, <i>Bombus pascuorum</i> Scopoli                                                                                                                                                                                                                                                                                                                                                                                                                                                      | 3   | 6 | Hymenoptera | Apidae         | 377 | 1.61    | -1.72 | 0.28   |
| H 9  | The halictids (Halictus and Lasioglossum) (females) | <i>Halictus</i> spp. (females), <i>Lasioglossum</i> spp. (females)                                                                                                                                                                                                                                                                                                                                                                                                                                                                                   | 119 | 3 | Hymenoptera | Halictidae     | 335 | 1.64    | 1.68  | -3.1*  |

|      |                                    |                                                                                                                                                                                                                                                                                                                                                                                                                                                                                                                                                                                                                                                                                                                                                                                                                                                                                                                                                                                                                                                                                                                                                                                                                                                                                                                                                                                                                                |     |   |             |              |     |         |        |        |
|------|------------------------------------|--------------------------------------------------------------------------------------------------------------------------------------------------------------------------------------------------------------------------------------------------------------------------------------------------------------------------------------------------------------------------------------------------------------------------------------------------------------------------------------------------------------------------------------------------------------------------------------------------------------------------------------------------------------------------------------------------------------------------------------------------------------------------------------------------------------------------------------------------------------------------------------------------------------------------------------------------------------------------------------------------------------------------------------------------------------------------------------------------------------------------------------------------------------------------------------------------------------------------------------------------------------------------------------------------------------------------------------------------------------------------------------------------------------------------------|-----|---|-------------|--------------|-----|---------|--------|--------|
| H 10 | The Anthophora bees and alike      | <i>Amegilla</i> spp., <i>Anthophora</i> spp. (except <i>A. plumipes</i> Pallas (male)), <i>Eucera</i> spp.                                                                                                                                                                                                                                                                                                                                                                                                                                                                                                                                                                                                                                                                                                                                                                                                                                                                                                                                                                                                                                                                                                                                                                                                                                                                                                                     | 68  | 4 | Hymenoptera | Apidae       | 55  | 2.75    | -4.56  | 1.19   |
| H 11 | The carpenter bees                 | <i>Xylocopa valga</i> Gerstaecker, <i>Xylocopa violacea</i> Linnaeus (female)                                                                                                                                                                                                                                                                                                                                                                                                                                                                                                                                                                                                                                                                                                                                                                                                                                                                                                                                                                                                                                                                                                                                                                                                                                                                                                                                                  | 2   | 6 | Hymenoptera | Apidae       | 73  | 5.53    | -7.8*  | 1.92   |
| H 12 | The grass-carrying wasp            | <i>Isodontia mexicana</i> Saussure                                                                                                                                                                                                                                                                                                                                                                                                                                                                                                                                                                                                                                                                                                                                                                                                                                                                                                                                                                                                                                                                                                                                                                                                                                                                                                                                                                                             | 1   | 7 | Hymenoptera | Sphecidae    | 40  | 6.56    | 2.01   | -8.19* |
| H 13 | The other leafcutter or mason bees | <i>Megachile</i> spp. (except <i>M. lagopoda</i> Linnaeus (male), <i>M. maritima</i> Kirby (male), <i>M. nigriventris</i> Schenck (male), <i>M. willughbiella</i> Kirby (male)), <i>Osmia</i> spp. (except <i>O. bicolor</i> Schrank (female), <i>O. cornuta</i> Latreille, <i>O. rufa</i> Linnaeus)                                                                                                                                                                                                                                                                                                                                                                                                                                                                                                                                                                                                                                                                                                                                                                                                                                                                                                                                                                                                                                                                                                                           | 74  | 4 | Hymenoptera | Megachilidae | 129 | 10.53*  | -5.04* | -5.44* |
| H 14 | The potter bees                    | <i>Anthidiellum</i> spp., <i>Anthidium</i> (except <i>A. punctatum</i> Latreille), <i>Icteranidium laterale</i> Latreille, <i>Pseudoanthidium</i> spp., <i>Stelis signata</i> Latreille                                                                                                                                                                                                                                                                                                                                                                                                                                                                                                                                                                                                                                                                                                                                                                                                                                                                                                                                                                                                                                                                                                                                                                                                                                        | 22  | 4 | Hymenoptera | Megachilidae | 75  | 12.68*  | -3.54  | -8.19* |
| L 1  | The gatekeepers                    | <i>Pyronia tithonus</i> Linnaeus, <i>Pyronia cecilia</i> Vallantin                                                                                                                                                                                                                                                                                                                                                                                                                                                                                                                                                                                                                                                                                                                                                                                                                                                                                                                                                                                                                                                                                                                                                                                                                                                                                                                                                             | 2   | 6 | Lepidoptera | Nymphalidae  | 51  | -17.98* | 13.03* | 6.72*  |
| L 2  | The small fritillaries and others  | <i>Argynnis adippe</i> Denis & Schiffermüller, <i>Argynnis niobe</i> Linnaeus, <i>Boloria</i> spp., <i>Brenthis</i> spp.                                                                                                                                                                                                                                                                                                                                                                                                                                                                                                                                                                                                                                                                                                                                                                                                                                                                                                                                                                                                                                                                                                                                                                                                                                                                                                       | 17  | 4 | Lepidoptera | Nymphalidae  | 44  | -17.96* | 2.53   | 15.78* |
| L 3  | The peacock butterfly              | <i>Aglais io</i> Linnaeus                                                                                                                                                                                                                                                                                                                                                                                                                                                                                                                                                                                                                                                                                                                                                                                                                                                                                                                                                                                                                                                                                                                                                                                                                                                                                                                                                                                                      | 1   | 7 | Lepidoptera | Nymphalidae  | 30  | -14.38* | 9.11   | 5.58   |
| L 4  | The other owl moths                | Noctuidae spp. (except <i>Abrostola</i> spp., <i>Amata</i> spp., <i>Anarta myrtilli</i> Linnaeus, <i>Atolmis rubricollis</i> Linnaeus, <i>Autographa</i> spp., <i>Bena bicolorana</i> Fuessly, <i>Callimorpha dominula</i> Linnaeus, <i>Euclidia mi</i> Clerck, <i>Charanyca trigrammica</i> Hufnagel, <i>Chrysodeixis chalcites</i> Esper, <i>Ctenoplusia accentifera</i> Lefebvre, <i>Cucullia argentea</i> Hufnagel, <i>Cybosia mesomella</i> Linnaeus, <i>Deltote bankiana</i> Fabricius, <i>Diachrysia</i> spp., <i>Dichonia aprilina</i> Linnaeus, <i>Dicycla oo</i> Linnaeus, <i>Drasteria cailino</i> Lefebvre, <i>Dysgonia algira</i> Linnaeus, <i>Eilema</i> spp., <i>Acontia trabealis</i> Scopoli, <i>Enterpia laudeti</i> Boisduval, <i>Euchalcia</i> spp., <i>Euplagia quadripunctaria</i> Poda, <i>Gortyna borelii</i> Pierret, <i>Grammodes bifasciata</i> Petagna, <i>Herminia</i> spp., <i>Hypena</i> spp., <i>Lamprotes c-aureum</i> Knoch, <i>Macdunnoughia confusa</i> Stephens, <i>Macrochilo</i> spp., <i>Miltochrista miniata</i> Forster, <i>Moma alpium</i> Osbeck, <i>Noctua fimbriata</i> Schreber, <i>Noctua pronuba</i> Linnaeus, <i>Panchrysia</i> spp., <i>Paracolax</i> spp., <i>Phlogophora meticulosa</i> Linnaeus, <i>Plusia</i> spp., <i>Polychrysia moneta</i> Fabricius, <i>Syngrapha</i> spp., <i>Thumatha senex</i> Hübner, <i>Thysanoplusia</i> spp., <i>Trichoplusia ni</i> Hübner) | 533 | 4 | Lepidoptera | Noctuidae    | 23  | -13.55* | 4.21   | 10.65* |
| L 5  | The tawny skippers                 | <i>Ochlodes sylvanus</i> Esper, <i>Thymelicus acteon</i> Rottemburg, <i>Thymelicus lineolus</i> Ochsenheimer, <i>Thymelicus sylvestris</i> Poda                                                                                                                                                                                                                                                                                                                                                                                                                                                                                                                                                                                                                                                                                                                                                                                                                                                                                                                                                                                                                                                                                                                                                                                                                                                                                | 4   | 3 | Lepidoptera | Hesperiidae  | 44  | -12.71* | 6.65   | 6.97*  |

|      |                                             |                                                                                                                                                                                                                                                                                                                                                                                                                                                                                                                                                                                                                                                                                                                                                                                                                                                  |    |   |             |             |     |         |       |        |
|------|---------------------------------------------|--------------------------------------------------------------------------------------------------------------------------------------------------------------------------------------------------------------------------------------------------------------------------------------------------------------------------------------------------------------------------------------------------------------------------------------------------------------------------------------------------------------------------------------------------------------------------------------------------------------------------------------------------------------------------------------------------------------------------------------------------------------------------------------------------------------------------------------------------|----|---|-------------|-------------|-----|---------|-------|--------|
| L 6  | The Euphydryas and Melitaea fritillaries    | <i>Euphydryas cynthia</i> Denis & Schiffermüller (female), <i>Euphydryas intermedia</i> Ménétriés, <i>Euphydryas maturna</i> Linnaeus, <i>Melitaea athalia</i> Rottemburg, <i>Melitaea aurelia</i> Nickerl, <i>Melitaea deione</i> Geyer, <i>Melitaea parthenoides</i> Keferstein, <i>Melitaea varia</i> Meyer-Dür                                                                                                                                                                                                                                                                                                                                                                                                                                                                                                                               | 8  | 4 | Lepidoptera | Nymphalidae | 37  | -12.66* | 4.37  | 9.27*  |
| L 7  | The scotch burnet and other burnets         | <i>Zygaena anthyllidis</i> Boisduval, <i>Zygaena brizae</i> Esper, <i>Zygaena carniolica</i> Scopoli, <i>Zygaena contaminei</i> Boisduval, <i>Zygaena corsica</i> Boisduval, <i>Zygaena cynarae</i> Esper, <i>Zygaena ephialtes</i> Linnaeus, <i>Zygaena erythrus</i> Hübner, <i>Zygaena exulans</i> Hohenwarth, <i>Zygaena fausta</i> Linnaeus, <i>Zygaena filipendulae</i> Linnaeus, <i>Zygaena hiliaris</i> Ochsenheimer, <i>Zygaena lonicera</i> Scheven, <i>Zygaena loti</i> Denis & Schiffermüller, <i>Zygaena minos</i> Denis & Schiffermüller, <i>Zygaena nevadensis</i> Rambur, <i>Zygaena occitanica</i> Villers, <i>Zygaena osterodensis</i> Reiss, <i>Zygaena purpuralis</i> Brünnich, <i>Zygaena romeo</i> Duponchel, <i>Zygaena transalpina</i> Esper, <i>Zygaena trifolii</i> Esper, <i>Zygaena viciae</i> Denis & Schiffermüller | 23 | 6 | Lepidoptera | Zygaenidae  | 47  | -7.97*  | -1.33 | 10.29* |
| L 8  | The meadow brown and others                 | <i>Hyponephele lupina</i> Costa, <i>Hyponephele lycaon</i> Kühn, <i>Maniola jurtina</i> Linnaeus                                                                                                                                                                                                                                                                                                                                                                                                                                                                                                                                                                                                                                                                                                                                                 | 3  | 4 | Lepidoptera | Nymphalidae | 114 | -7.79*  | 7.7*  | 1.31   |
| L 9  | The hummingbird hawk-moth                   | <i>Macroglossum stellatarum</i> Linnaeus                                                                                                                                                                                                                                                                                                                                                                                                                                                                                                                                                                                                                                                                                                                                                                                                         | 1  | 7 | Lepidoptera | Sphingidae  | 70  | -5.79   | 5.01  | 0.81   |
| L 10 | The males of silver-studded blue and others | <i>Plebeius argus</i> Linnaeus (male), <i>Plebeius argyrognomon</i> Bergsträsser (male), <i>Plebeius idas</i> Linnaeus (male), <i>Plebeius pylaon</i> Fischer von Waldheim (male), <i>Polyommatus amandus</i> Schneider (male), <i>Polyommatus bellargus</i> Rottemburg (male), <i>Polyommatus coridon</i> Poda (male), <i>Polyommatus dorylas</i> Denis & Schiffermüller (male), <i>Polyommatus eros</i> Ochsenheimer (male), <i>Polyommatus escheri</i> Hübner (male), <i>Polyommatus hispana</i> Herrich-Schäffer (male), <i>Polyommatus icarus</i> Rottemburg (male), <i>Polyommatus thersites</i> Cantener (male)                                                                                                                                                                                                                           | 13 | 4 | Lepidoptera | Lycaenidae  | 48  | -5.53   | 0.83  | 5.89   |

|      |                              |                                                                                                                                                                                                                                                                                                                                                                                                                                                                                                                                                                                                                                                                                                                                                                                                                                                                                                                       |    |   |             |              |     |       |       |       |
|------|------------------------------|-----------------------------------------------------------------------------------------------------------------------------------------------------------------------------------------------------------------------------------------------------------------------------------------------------------------------------------------------------------------------------------------------------------------------------------------------------------------------------------------------------------------------------------------------------------------------------------------------------------------------------------------------------------------------------------------------------------------------------------------------------------------------------------------------------------------------------------------------------------------------------------------------------------------------|----|---|-------------|--------------|-----|-------|-------|-------|
| L 11 | The brown blues              | <i>Cupido alcetas</i> Hoffmannsegg (female), <i>Cupido minimus</i> Fuessly, <i>Cupido osiris</i> Meigen (female), <i>Glaucopsyche iolas</i> Ochsenheimer (female), <i>Plebeius agestis</i> Denis & Schiffermüller, <i>Plebeius artaxerxes</i> Fabricius, <i>Plebeius morronensis</i> Ribbe, <i>Plebeius pylaon</i> Fischer von Waldheim (female), <i>Polyommatus amandus</i> Schneider (female), <i>Polyommatus bellargus</i> Rottemburg (female), <i>Polyommatus coridon</i> Poda (female), <i>Polyommatus daphnis</i> Denis & Schiffermüller (female), <i>Polyommatus dorylas</i> Denis & Schiffermüller (female), <i>Polyommatus eros</i> Ochsenheimer (female), <i>Polyommatus escheri</i> Hübner (female), <i>Polyommatus hispana</i> Herrich-Schäffer (female), <i>Polyommatus icarus</i> Rottemburg (female), <i>Polyommatus semiargus</i> Rottemburg (female), <i>Polyommatus thersites</i> Cantener (female) | 19 | 4 | Lepidoptera | Lycaenidae   | 43  | -2.96 | -0.79 | 4.95  |
| L 12 | The cabbage white and others | <i>Pieris</i> spp. (except <i>P. bryoniae</i> Hübner, <i>P. napi</i> Linnaeus)                                                                                                                                                                                                                                                                                                                                                                                                                                                                                                                                                                                                                                                                                                                                                                                                                                        | 4  | 6 | Lepidoptera | Pieridae     | 141 | -2.95 | 5.04* | -1.48 |
| L 13 | The scarce swallowtail       | <i>Iphiclides podalirius</i> Linnaeus                                                                                                                                                                                                                                                                                                                                                                                                                                                                                                                                                                                                                                                                                                                                                                                                                                                                                 | 1  | 7 | Lepidoptera | Papilionidae | 42  | -1.48 | -0.28 | 1.27  |

---

The identity of the 60 frequent taxa. “Taxa code” corresponds to the frequent taxa represented in Fig. 3. The taxonomic resolution is coded as 2 = a whole family, 3 = several genera within a family, 4 = species from different genera, 5 = a genus, 6 = species from a genus and 7 = a single species. Affinities with the three land-use types (Urb., Agr. and Nat. standing for Urban, Agricultural and Natural, respectively) marked with a “\*” are significantly different from 0 and thus define taxa that are either specialist or avoider of a land-use type.
