# Supplementary material for: The Whereabouts of Flower Visitors: Contrasting Land-Use Preferences Revealed by a Country-Wide Survey Based on Citizen Science
Source: PubMed Central journal article supplement (PMC3446938; doi:10.1371/journal.pone.0045822), 2012-09-19
Supplement: pone.0045822.s004.pdf [file pone.0045822.s004.pdf]

**Table S2. The description of the 223 infrequent taxa.**

| Taxa identity                           | Species list                                                                                                                                                                                                                                                                                                                                                                                                                                     | Nb. of species included | Taxonomic resolution | Order      | Family       | Nb. Of pictures |
|-----------------------------------------|--------------------------------------------------------------------------------------------------------------------------------------------------------------------------------------------------------------------------------------------------------------------------------------------------------------------------------------------------------------------------------------------------------------------------------------------------|-------------------------|----------------------|------------|--------------|-----------------|
|                                         | <i>Ptinomorphus imperialis</i> Linnaeus                                                                                                                                                                                                                                                                                                                                                                                                          | 1                       | 7                    | Coleoptera | Anobiidae    | 1               |
| The shining buprestid beetles           | <i>Anthaxia</i> spp. (except <i>A. confusa</i> Gory, <i>A. godeti</i> Gory & Laporte, <i>A. helvetica</i> Stierlin, <i>A. hungarica</i> Scopoli, <i>A. nitidula</i> Linnaeus (female), <i>A. millefolii</i> Fabricius, <i>A. morio</i> Fabricius, <i>A. nigrojubata</i> Roubal, <i>A. quadripunctata</i> Linnaeus, <i>A. sepulchralis</i> Fabricius, <i>A. umbellatarum</i> Fabricius)                                                           | 26                      | 4                    | Coleoptera | Buprestidae  | 21              |
| The spotted buprestid beetles           | <i>Acmaeodera bipunctata</i> Olivier, <i>Acmaeodera degener</i> Scopoli, <i>Acmaeodera quadrifasciata</i> Rossi, <i>Acmaeoderella</i> spp.                                                                                                                                                                                                                                                                                                       | 7                       | 4                    | Coleoptera | Buprestidae  | 2               |
| The drab wood-boring beetles            | <i>Acmaeodera cylindrica</i> Fabricius, <i>Anthaxia confusa</i> Gory, <i>Anthaxia godeti</i> Gory & Laporte, <i>Anthaxia helvetica</i> Stierlin, <i>Anthaxia hungarica</i> Scopoli, <i>Anthaxia millefolii</i> Fabricius, <i>Anthaxia morio</i> Fabricius, <i>Anthaxia nigrojubata</i> Roubal, <i>Anthaxia quadripunctata</i> Linnaeus, <i>Anthaxia sepulchralis</i> Fabricius, <i>Anthaxia umbellatarum</i> Fabricius, <i>Aphanisticus</i> spp. | 17                      | 4                    | Coleoptera | Buprestidae  | 2               |
|                                         | <i>Byturus ochraceus</i> Scriba                                                                                                                                                                                                                                                                                                                                                                                                                  | 1                       | 7                    | Coleoptera | Byturidae    | 2               |
| The raspberry beetle                    | <i>Byturus tomentosus</i> De Geer                                                                                                                                                                                                                                                                                                                                                                                                                | 1                       | 7                    | Coleoptera | Byturidae    | 2               |
| The Cantharids (1)                      | <i>Cantharis fusca</i> Linnaeus, <i>Cantharis obscura</i> Linnaeus, <i>Cantharis pulicaria</i> Fabricius, <i>Cantharis rustica</i> Fallén                                                                                                                                                                                                                                                                                                        | 4                       | 6                    | Coleoptera | Cantharidae  | 15              |
|                                         | <i>Agapanthia cardui</i> Linnaeus                                                                                                                                                                                                                                                                                                                                                                                                                | 1                       | 7                    | Coleoptera | Cerambycidae | 1               |
| The flower longhorn with six patches    | <i>Anoplodera sexguttata</i> Fabricius                                                                                                                                                                                                                                                                                                                                                                                                           | 1                       | 7                    | Coleoptera | Cerambycidae | 1               |
| The flower longhorn with a black suture | <i>Stenurella melanura</i> Linnaeus                                                                                                                                                                                                                                                                                                                                                                                                              | 1                       | 7                    | Coleoptera | Cerambycidae | 7               |
| The golden flower longhorn              | <i>Leptura aurulenta</i> Fabricius                                                                                                                                                                                                                                                                                                                                                                                                               | 1                       | 7                    | Coleoptera | Cerambycidae | 1               |
| The red flower longhorn (female)        | <i>Stictoleptura rubra</i> Linnaeus (female)                                                                                                                                                                                                                                                                                                                                                                                                     | 1                       | 7                    | Coleoptera | Cerambycidae | 2               |
| The one-spot flower longhorn            | <i>Vadonia unipunctata</i> Fabricius                                                                                                                                                                                                                                                                                                                                                                                                             | 1                       | 7                    | Coleoptera | Cerambycidae | 3               |
| The three-band longhorn                 | <i>Chlorophorus trifasciatus</i> Fabricius                                                                                                                                                                                                                                                                                                                                                                                                       | 1                       | 7                    | Coleoptera | Cerambycidae | 2               |
| The masked longhorns                    | <i>Chlorophorus figuratus</i> Scopoli, <i>Chlorophorus sartor</i> Müller                                                                                                                                                                                                                                                                                                                                                                         | 2                       | 6                    | Coleoptera | Cerambycidae | 4               |
|                                         | <i>Chlorophorus pilosus</i> Forster                                                                                                                                                                                                                                                                                                                                                                                                              | 1                       | 7                    | Coleoptera | Cerambycidae | 1               |
|                                         | <i>Chlorophorus varius</i> Müller                                                                                                                                                                                                                                                                                                                                                                                                                | 1                       | 7                    | Coleoptera | Cerambycidae | 2               |
|                                         | <i>Dinoptera collaris</i> Linnaeus                                                                                                                                                                                                                                                                                                                                                                                                               | 1                       | 7                    | Coleoptera | Cerambycidae | 5               |
|                                         | <i>Alosterna tabacicolor</i> De Geer                                                                                                                                                                                                                                                                                                                                                                                                             | 1                       | 7                    | Coleoptera | Cerambycidae | 2               |

|                                     |                                                                                                                                                                                                                                                                                                                                                                                                                                                                                                                                                                                                                                       |     |   |            |               |    |
|-------------------------------------|---------------------------------------------------------------------------------------------------------------------------------------------------------------------------------------------------------------------------------------------------------------------------------------------------------------------------------------------------------------------------------------------------------------------------------------------------------------------------------------------------------------------------------------------------------------------------------------------------------------------------------------|-----|---|------------|---------------|----|
| The capricorn beetle                | <i>Cerambyx scopolii</i> Fuessly                                                                                                                                                                                                                                                                                                                                                                                                                                                                                                                                                                                                      | 1   | 7 | Coleoptera | Cerambycidae  | 4  |
| The tawny longhorn beetles          | <i>Agapanthia asphodeli</i> Latreille, <i>Agapanthia cynarae</i> Gyllenhal, <i>Agapanthia dahli</i> Richter, <i>Agapanthia kirby</i> Gyllenhal, <i>Agapanthia villosviridescens</i> De Geer                                                                                                                                                                                                                                                                                                                                                                                                                                           | 5   | 6 | Coleoptera | Cerambycidae  | 2  |
| The wasp longhorn beetles           | <i>Clytus arietis</i> Linnaeus, <i>Clytus lama</i> Mulsant, <i>Clytus rhamni</i> Germar, <i>Clytus tropicus</i> Panzer, <i>Cyrtoclytus capra</i> Germar, <i>Xylotrechus antilope</i> Schönherr                                                                                                                                                                                                                                                                                                                                                                                                                                        | 6   | 5 | Coleoptera | Cerambycidae  | 8  |
| The black longhorns with red legs   | <i>Anoplodera rufipes</i> Schaller, <i>Paracorymbia stragulata</i> Germar, <i>Ropalopus femoratus</i> Linnaeus, <i>Ropalopus varini</i> Bedel                                                                                                                                                                                                                                                                                                                                                                                                                                                                                         | 4   | 4 | Coleoptera | Cerambycidae  | 2  |
|                                     | <i>Stenurella bifasciata</i> Müller, <i>Stictoleptura cordigera</i> Fuessly                                                                                                                                                                                                                                                                                                                                                                                                                                                                                                                                                           | 2   | 4 | Coleoptera | Cerambycidae  | 14 |
|                                     | <i>Stenopterus</i> spp.                                                                                                                                                                                                                                                                                                                                                                                                                                                                                                                                                                                                               | 2   | 5 | Coleoptera | Cerambycidae  | 20 |
|                                     | <i>Valgus hemipterus</i> Linnaeus                                                                                                                                                                                                                                                                                                                                                                                                                                                                                                                                                                                                     | 1   | 7 | Coleoptera | Cetoniidae    | 15 |
|                                     | <i>Gnorimus nobilis</i> Linnaeus                                                                                                                                                                                                                                                                                                                                                                                                                                                                                                                                                                                                      | 1   | 7 | Coleoptera | Cetoniidae    | 1  |
| The dark hairless chafers           | <i>Protaetia morio</i> Fabricius, <i>Protaetia oblonga</i> Gory & Percheron, <i>Protaetia opaca</i> Fabricius                                                                                                                                                                                                                                                                                                                                                                                                                                                                                                                         | 3   | 6 | Coleoptera | Cetoniidae    | 8  |
| The bee beetles                     | <i>Trichius</i> spp.                                                                                                                                                                                                                                                                                                                                                                                                                                                                                                                                                                                                                  | 3   | 5 | Coleoptera | Cetoniidae    | 31 |
| The rosemary beetle                 | <i>Chrysolina americana</i> Linnaeus                                                                                                                                                                                                                                                                                                                                                                                                                                                                                                                                                                                                  | 1   | 7 | Coleoptera | Chrysomelidae | 13 |
| The scarlet lily beetle and others  | <i>Exosoma</i> spp., <i>Lilioceris lili</i> Scopoli                                                                                                                                                                                                                                                                                                                                                                                                                                                                                                                                                                                   | 2   | 4 | Coleoptera | Chrysomelidae | 4  |
|                                     | <i>Cryptocephalus vittatus</i> Fabricius                                                                                                                                                                                                                                                                                                                                                                                                                                                                                                                                                                                              | 1   | 7 | Coleoptera | Chrysomelidae | 3  |
|                                     | <i>Donacia</i> spp., <i>Plateumaris</i> spp.                                                                                                                                                                                                                                                                                                                                                                                                                                                                                                                                                                                          | 27  | 3 | Coleoptera | Chrysomelidae | 1  |
| The two coloured leaf beetles       | Chrysomelidae spp. (except <i>Bruchidius</i> spp., <i>Bruchus</i> spp., <i>Callosobruchus</i> spp., <i>Cassida</i> spp., <i>Chrysolina</i> spp., <i>Clytra laeviusculalytra</i> Ratzeburg, <i>Clytra quadripunctata</i> Linnaeus, <i>Coptocephala</i> spp., <i>Cryptocephalus</i> spp., <i>Entomoscelis</i> spp., <i>Labidostomis humeralis</i> Schneider, <i>Labidostomis taxicornis</i> Fabricius, <i>Lachnaia sexpunctata</i> Scopoli, <i>Lachnaia tristigma</i> Lacordaire, <i>Oreina</i> spp., <i>Oulema duftschmidi</i> Redtenbacher, <i>Oulema gallaeciana</i> Heyden, <i>Oulema melanopus</i> Linnaeus, <i>Timarcha</i> spp.) | 583 | 2 | Coleoptera | Chrysomelidae | 6  |
|                                     | <i>Oulema duftschmidi</i> Redtenbacher, <i>Oulema gallaeciana</i> Heyden, <i>Oulema melanopus</i> Linnaeus                                                                                                                                                                                                                                                                                                                                                                                                                                                                                                                            | 3   | 6 | Coleoptera | Chrysomelidae | 2  |
|                                     | <i>Clytra laeviusculalytra</i> Ratzeburg, <i>Clytra quadripunctata</i> Linnaeus, <i>Cryptocephalus rugicollis</i> G.A.Olivier, <i>Cryptocephalus trimaculatus</i> Rossi, <i>Lachnaia sexpunctata</i> Scopoli, <i>Lachnaia tristigma</i> Lacordaire                                                                                                                                                                                                                                                                                                                                                                                    | 6   | 6 | Coleoptera | Chrysomelidae | 4  |
|                                     | <i>Coptocephala</i> spp.                                                                                                                                                                                                                                                                                                                                                                                                                                                                                                                                                                                                              | 4   | 5 | Coleoptera | Chrysomelidae | 1  |
|                                     | <i>Trichodes octopunctatus</i> Fabricius                                                                                                                                                                                                                                                                                                                                                                                                                                                                                                                                                                                              | 1   | 7 | Coleoptera | Cleridae      | 1  |
|                                     | <i>Trichodes alvearius</i> Fabricius                                                                                                                                                                                                                                                                                                                                                                                                                                                                                                                                                                                                  | 1   | 7 | Coleoptera | Cleridae      | 24 |
|                                     | <i>Trichodes apiarius</i> Linnaeus, <i>Trichodes leucopsideus</i> Olivier                                                                                                                                                                                                                                                                                                                                                                                                                                                                                                                                                             | 2   | 6 | Coleoptera | Cleridae      | 17 |
| The ladybirds larvae                | Coccinellidae spp.                                                                                                                                                                                                                                                                                                                                                                                                                                                                                                                                                                                                                    | 111 | 2 | Coleoptera | Coccinellidae | 6  |
| The apple blossom weevil and others | <i>Anthonomus</i> spp., <i>Curculio</i> spp.                                                                                                                                                                                                                                                                                                                                                                                                                                                                                                                                                                                          | 25  | 3 | Coleoptera | Curculionidae | 1  |

|                                    |                                                                                                                                                                                                                                                                                                                   |     |   |            |               |    |
|------------------------------------|-------------------------------------------------------------------------------------------------------------------------------------------------------------------------------------------------------------------------------------------------------------------------------------------------------------------|-----|---|------------|---------------|----|
| The Cyphocleonus and Lixus weevils | <i>Cyphocleonus</i> spp., <i>Lixus</i> spp.                                                                                                                                                                                                                                                                       | 36  | 3 | Coleoptera | Curculionidae | 3  |
|                                    | <i>Phyllobius</i> spp., <i>Polydrusus</i> spp.                                                                                                                                                                                                                                                                    | 46  | 3 | Coleoptera | Curculionidae | 1  |
|                                    | <i>Dascillus cervinus</i> Linnaeus                                                                                                                                                                                                                                                                                | 1   | 7 | Coleoptera | Dascillidae   | 1  |
|                                    | <i>Psilothrix</i> spp.                                                                                                                                                                                                                                                                                            | 2   | 4 | Coleoptera | Dasytidae     | 5  |
|                                    | <i>Ampedus</i> spp. (except <i>A. cinnaberinus</i> Eschscholtz, <i>A. rufipennis</i> Stephens, <i>A. sanguineus</i> Linnaeus),<br><i>Denticollis</i> spp., <i>Hemicrepidius</i> spp., <i>Limoniscus</i> spp., <i>Megapenthes</i> spp., <i>Melanotus</i> spp., <i>Pheletes</i> spp.                                | 39  | 4 | Coleoptera | Elateridae    | 6  |
|                                    | Elateridae spp. (except <i>Ampedus</i> spp., <i>Anostirus castaneus</i> Linnaeus, <i>Anostirus purpureus</i> Poda,<br><i>Calambus bipustulatus</i> Linnaeus, <i>Denticollis</i> spp., <i>Hemicrepidius</i> spp., <i>Limoniscus</i> spp.,<br><i>Megapenthes</i> spp., <i>Melanotus</i> spp., <i>Pheletes</i> spp.) | 168 | 2 | Coleoptera | Elateridae    | 2  |
|                                    | Lycidae spp.                                                                                                                                                                                                                                                                                                      | 7   | 2 | Coleoptera | Lycidae       | 1  |
|                                    | <i>Anthocomus fasciatus</i> Linnaeus                                                                                                                                                                                                                                                                              | 1   | 7 | Coleoptera | Malachiidae   | 1  |
|                                    | <i>Axinotarsus marginalis</i> Laporte de Castelnau, <i>Axinotarsus pulicarius</i> Fabricius, <i>Clanoptilus elegans</i> Olivier,<br><i>Malachius bipustulatus</i> Linnaeus, <i>Malachius lusitanicus</i> Erichson                                                                                                 | 5   | 4 | Coleoptera | Malachiidae   | 8  |
|                                    | <i>Ebaeus collaris</i> Erichson, <i>Ebaeus thoracicus</i> Fourcroy                                                                                                                                                                                                                                                | 2   | 5 | Coleoptera | Malachiidae   | 1  |
|                                    | <i>Actenodia billbergi</i> Gyllenhal, <i>Mylabris connata</i> Rey, <i>Mylabris flexuosa</i> Olivier, <i>Mylabris hieracii</i> Graells,<br><i>Mylabris quadripunctata</i> Linnaeus, <i>Mylabris varians</i> Gyllenhal                                                                                              | 6   | 4 | Coleoptera | Meloidae      | 5  |
| The oil beetles                    | <i>Meloe</i> spp.                                                                                                                                                                                                                                                                                                 | 15  | 5 | Coleoptera | Meloidae      | 2  |
|                                    | <i>Mycterus</i> spp.                                                                                                                                                                                                                                                                                              | 3   | 5 | Coleoptera | Mycteridae    | 2  |
|                                    | <i>Chrysanthia geniculata</i> W. Schmidt, <i>Chrysanthia viridissima</i> Linnaeus, <i>Ischnomera caerulea</i> Linnaeus,<br><i>Ischnomera cinerascens</i> Pandellé in Grénier, <i>Ischnomera cyanea</i> Fabricius, <i>Ischnomera xanthoderes</i> Mulsant                                                           | 6   | 4 | Coleoptera | Oedemeridae   | 8  |
| The cardinal beetle                | <i>Pyrochroa coccinea</i> Linnaeus                                                                                                                                                                                                                                                                                | 1   | 7 | Coleoptera | Pyrochroidae  | 1  |
|                                    | <i>Pyrochroa serraticornis</i> Scopoli                                                                                                                                                                                                                                                                            | 1   | 7 | Coleoptera | Pyrochroidae  | 2  |
|                                    | <i>Hoplia argentea</i> Poda                                                                                                                                                                                                                                                                                       | 1   | 7 | Coleoptera | Rutelidae     | 3  |
|                                    | <i>Hoplia coerulea</i> Drury                                                                                                                                                                                                                                                                                      | 1   | 7 | Coleoptera | Rutelidae     | 1  |
|                                    | <i>Anisoplia austriaca</i> Herbst, <i>Phyllopertha horticola</i> Linnaeus                                                                                                                                                                                                                                         | 2   | 4 | Coleoptera | Rutelidae     | 6  |
|                                    | Scraptiidae spp.                                                                                                                                                                                                                                                                                                  | 30  | 2 | Coleoptera | Scraptiidae   | 16 |
|                                    | <i>Hymenalia rufipes</i> Fabricius, <i>Isomira</i> spp., <i>Pseudocistela ceramboides</i> Linnaeus                                                                                                                                                                                                                | 30  | 3 | Coleoptera | Tenebrionidae | 2  |
| The robber flies                   | <i>Asilidae</i> spp. except ( <i>Laphria</i> spp.)                                                                                                                                                                                                                                                                | 158 | 3 | Diptera    | Asilidae      | 3  |
|                                    | <i>Bibio hortulanus</i> Linnaeus (female)                                                                                                                                                                                                                                                                         | 1   | 7 | Diptera    | Bibionidae    | 2  |
|                                    | <i>Hemipenthes maura</i> Linnaeus                                                                                                                                                                                                                                                                                 | 1   | 7 | Diptera    | Bombyliidae   | 1  |
|                                    | <i>Hemipenthes morio</i> Linnaeus                                                                                                                                                                                                                                                                                 | 1   | 7 | Diptera    | Bombyliidae   | 6  |
|                                    | <i>Hemipenthes velutina</i> Meigen                                                                                                                                                                                                                                                                                | 1   | 7 | Diptera    | Bombyliidae   | 2  |
|                                    | <i>Bombylella atra</i> Scopoli                                                                                                                                                                                                                                                                                    | 1   | 7 | Diptera    | Bombyliidae   | 1  |

|                                                                                                                                                                                                                                                                                                 |    |   |         |                 |    |
|-------------------------------------------------------------------------------------------------------------------------------------------------------------------------------------------------------------------------------------------------------------------------------------------------|----|---|---------|-----------------|----|
| <i>Villa</i> spp.                                                                                                                                                                                                                                                                               | 21 | 5 | Diptera | Bombyliidae     | 17 |
| <i>Geron</i> spp.                                                                                                                                                                                                                                                                               | 3  | 5 | Diptera | Bombyliidae     | 3  |
| <i>Lomatia</i> spp.                                                                                                                                                                                                                                                                             | 5  | 5 | Diptera | Bombyliidae     | 4  |
| <i>Usia</i> spp.                                                                                                                                                                                                                                                                                | 7  | 5 | Diptera | Bombyliidae     | 1  |
| <i>Stomorhina lunata</i> Fabricius                                                                                                                                                                                                                                                              | 1  | 7 | Diptera | Calliphoridae   | 23 |
| <i>Thaumatomyia</i> spp.                                                                                                                                                                                                                                                                        | 8  | 5 | Diptera | Chloropidae     | 18 |
| <i>Myopa</i> spp.                                                                                                                                                                                                                                                                               | 12 | 5 | Diptera | Conopidae       | 1  |
| Culicidae spp.                                                                                                                                                                                                                                                                                  | 58 | 2 | Diptera | Culicidae       | 6  |
| <i>Mesembrina meridiana</i> Linnaeus                                                                                                                                                                                                                                                            | 1  | 7 | Diptera | Muscidae        | 2  |
| <i>Graphomya</i> spp.                                                                                                                                                                                                                                                                           | 2  | 5 | Diptera | Muscidae        | 18 |
| <i>Anthomyia pluvialis</i> Linnaeus, <i>Anthomyia procellaris</i> Rondani, <i>Limnophora maculosa</i> Meigen, <i>Limnophora obsignata</i> Rondani, <i>Limnophora riparia</i> Fallén, <i>Limnophora tigrina</i> Am Stein                                                                         | 6  | 4 | Diptera | Muscidae        | 10 |
| <i>Platystoma</i> spp.                                                                                                                                                                                                                                                                          | 6  | 5 | Diptera | Platystomatidae | 2  |
| Scatopsidae spp.                                                                                                                                                                                                                                                                                | 52 | 2 | Diptera | Scatopsidae     | 7  |
| Sciaridae spp.                                                                                                                                                                                                                                                                                  | 81 | 2 | Diptera | Sciaridae       | 6  |
| <i>Chloromyia</i> spp.                                                                                                                                                                                                                                                                          | 2  | 5 | Diptera | Stratiomyidae   | 9  |
| <i>Odontomyia flavissima</i> Rossi, <i>Odontomyia limbata</i> Meigen                                                                                                                                                                                                                            | 2  | 6 | Diptera | Stratiomyidae   | 1  |
| <i>Stratiomys chamaeleon</i> Linnaeus, <i>Stratiomys potamida</i> Meigen                                                                                                                                                                                                                        | 2  | 5 | Diptera | Stratiomyidae   | 1  |
| <i>Eristalinus taeniops</i> Wiedemann                                                                                                                                                                                                                                                           | 1  | 7 | Diptera | Syrphidae       | 7  |
| <i>Chrysogaster solstitialis</i> Fallén                                                                                                                                                                                                                                                         | 1  | 7 | Diptera | Syrphidae       | 11 |
| <i>Ferdinandea cuprea</i> Scopoli                                                                                                                                                                                                                                                               | 1  | 7 | Diptera | Syrphidae       | 2  |
| <i>Milesia crabroniformis</i> Fabricius                                                                                                                                                                                                                                                         | 1  | 7 | Diptera | Syrphidae       | 3  |
| <i>Volucella pellucens</i> Linnaeus                                                                                                                                                                                                                                                             | 1  | 7 | Diptera | Syrphidae       | 11 |
| <i>Volucella inanis</i> Linnaeus                                                                                                                                                                                                                                                                | 1  | 7 | Diptera | Syrphidae       | 2  |
| <i>Volucella zonaria</i> Poda                                                                                                                                                                                                                                                                   | 1  | 7 | Diptera | Syrphidae       | 35 |
| <i>Chrysotoxum bicinctum</i> Linnaeus                                                                                                                                                                                                                                                           | 1  | 7 | Diptera | Syrphidae       | 1  |
| <i>Riponnensia splendens</i> Meigen                                                                                                                                                                                                                                                             | 1  | 7 | Diptera | Syrphidae       | 4  |
| <i>Chrysotoxum</i> spp. (except <i>Chrysotoxum bicinctum</i> Linnaeus)                                                                                                                                                                                                                          | 11 | 5 | Diptera | Syrphidae       | 13 |
| <i>Eristalinus aneneus</i> Scopoli, <i>Eristalinus sephulchralis</i> Linnaeus                                                                                                                                                                                                                   | 2  | 6 | Diptera | Syrphidae       | 7  |
| <i>Helophilus</i> spp., <i>Parhelophilus</i> spp.                                                                                                                                                                                                                                               | 7  | 3 | Diptera | Syrphidae       | 27 |
| <i>Arctophila bombiforme</i> Fallén, <i>Eriozona syrphoides</i> Fallén, <i>Eristalis intricaria</i> Linnaeus, <i>Cheilosia illustrata</i> Harris, <i>Criorhina ranunculi</i> Panzer, <i>Merodon clavipes</i> Fabricius, <i>Merodon equestris</i> Fabricius, <i>Volucella bombylans</i> Linnaeus | 8  | 4 | Diptera | Syrphidae       | 19 |
| <i>Callicera</i> spp.                                                                                                                                                                                                                                                                           | 6  | 5 | Diptera | Syrphidae       | 1  |
| <i>Chrysops</i> spp.                                                                                                                                                                                                                                                                            | 9  | 5 | Diptera | Tabanidae       | 2  |
| <i>Atylotus</i> spp., <i>Silvius</i> spp.                                                                                                                                                                                                                                                       | 9  | 3 | Diptera | Tabanidae       | 2  |

|                                              |                                                                                                                                                                                                                                                                                                                 |     |   |             |            |    |
|----------------------------------------------|-----------------------------------------------------------------------------------------------------------------------------------------------------------------------------------------------------------------------------------------------------------------------------------------------------------------|-----|---|-------------|------------|----|
|                                              | Tabanidae spp. (except <i>Atylotus</i> spp., <i>Chrysops</i> spp., <i>Haematopota pluvialis</i> Linnaeus, <i>Silvius</i> spp.)                                                                                                                                                                                  | 70  | 4 | Diptera     | Tabanidae  | 5  |
|                                              | <i>Tachina grossa</i> Linnaeus                                                                                                                                                                                                                                                                                  | 1   | 7 | Diptera     | Tachinidae | 6  |
|                                              | <i>Trichopoda pennipes</i> Fabricius                                                                                                                                                                                                                                                                            | 1   | 7 | Diptera     | Tachinidae | 2  |
|                                              | <i>Gymnosoma</i> spp.                                                                                                                                                                                                                                                                                           | 9   | 5 | Diptera     | Tachinidae | 18 |
| The stiletto flies                           | Therevidae spp.                                                                                                                                                                                                                                                                                                 | 25  | 2 | Diptera     | Therevidae | 2  |
| The crane flies                              | Tipulidae spp.                                                                                                                                                                                                                                                                                                  | 139 | 2 | Diptera     | Tipulidae  | 9  |
| The tawny mining bee (female)                | <i>Andrena fulva</i> Müller (female)                                                                                                                                                                                                                                                                            | 1   | 7 | Hymenoptera | Andrenidae | 2  |
|                                              | <i>Andrena morio</i> Brullé                                                                                                                                                                                                                                                                                     | 1   | 7 | Hymenoptera | Andrenidae | 5  |
| The mining bees with a red and black abdomen | <i>Andrena florea</i> Fabricius, <i>Andrena hattorfiana</i> Fabricius, <i>Andrena labiata</i> Fabricius, <i>Andrena marginata</i> Fabricius, <i>Andrena pellucens</i> Perez, <i>Andrena potentillae</i> Panzer, <i>Andrena rosae</i> Panzer, <i>Andrena sardoa</i> Lepeletier, <i>Andrena schencki</i> Morawitz | 9   | 6 | Hymenoptera | Andrenidae | 7  |
| The mining bees with black and white fur     | <i>Andrena agilissima</i> Scopoli, <i>Andrena apicata</i> Smith, <i>Andrena cineraria</i> Linnaeus, <i>Andrena cinerea</i> Brullé, <i>Andrena vaga</i> Panzer                                                                                                                                                   | 5   | 6 | Hymenoptera | Andrenidae | 17 |
| The violet carpenter bee (male)              | <i>Xylocopa violacea</i> Linnaeus (male)                                                                                                                                                                                                                                                                        | 1   | 7 | Hymenoptera | Apidae     | 7  |
| The blue small carpenter bees                | <i>Ceratina chalcites</i> Germar, <i>Ceratina chalybea</i> Chevriér, <i>Ceratina cyanea</i> Kirby                                                                                                                                                                                                               | 3   | 6 | Hymenoptera | Apidae     | 14 |
| The black and white cuckoo bees (1)          | <i>Epeolus fallax</i> Morawitz, <i>Melecta</i> spp., <i>Thyreus</i> spp.                                                                                                                                                                                                                                        | 19  | 4 | Hymenoptera | Apidae     | 6  |
| The black and white cuckoo bees (2)          | <i>Epeolus</i> spp. (except <i>Epeolus fallax</i> Morawitz)                                                                                                                                                                                                                                                     | 6   | 4 | Hymenoptera | Apidae     | 1  |
| The black, yellow and red cuckoo bees        | <i>Epeoloides coecutiens</i> Fabricius (male), <i>Nomada</i> spp.                                                                                                                                                                                                                                               | 95  | 4 | Hymenoptera | Apidae     | 11 |
| The yellow and black bumble bees             | <i>Bombus barbutellus</i> Kirby, <i>Bombus campestris</i> Panzer                                                                                                                                                                                                                                                | 2   | 6 | Hymenoptera | Apidae     | 34 |
| The yellow, black and white bumble bees      | <i>Bombus bohemicus</i> Seid, <i>Bombus norvegicus</i> Sparre-Schneider, <i>Bombus sylvestris</i> Lepeletier, <i>Bombus vestalis</i> Geoffroy                                                                                                                                                                   | 4   | 6 | Hymenoptera | Apidae     | 17 |
| The long-horned bees and others (males)      | <i>Eucera</i> spp. (males), <i>Tetralonia</i> spp. (males)                                                                                                                                                                                                                                                      | 34  | 4 | Hymenoptera | Apidae     | 13 |

|                                       |                                                                                                                                                                                                                                                                                                                                                                                                                                                                                                                                                                                                                                                           |     |   |             |                  |    |
|---------------------------------------|-----------------------------------------------------------------------------------------------------------------------------------------------------------------------------------------------------------------------------------------------------------------------------------------------------------------------------------------------------------------------------------------------------------------------------------------------------------------------------------------------------------------------------------------------------------------------------------------------------------------------------------------------------------|-----|---|-------------|------------------|----|
| The patterned stem sawflies           | <i>Calameuta filiformis</i> Eversmann, <i>Calameuta haemorrhoidalis</i> Fabricius (male), <i>Calameuta idolon</i> Rossi, <i>Cephus brachycercus</i> C. G. Thomson, <i>Cephus infuscatus</i> C. G. Thomson, <i>Cephus lateralis</i> Konow, <i>Cephus pygmaeus</i> Linnaeus, <i>Cephus spinipes</i> Panzer, <i>Hartigia helleri</i> Taschenberg, <i>Hartigia linearis</i> Schrank, <i>Hartigia nigra</i> Harris, <i>Hartigia xanthostoma</i> Eversmann, <i>Janus compressus</i> Fabricius, <i>Trachelus tabidus</i> Fabricius, <i>Trachelus troglodyta</i> Fabricius                                                                                        | 15  | 4 | Hymenoptera | Cephidae         | 1  |
| The plain stem sawflies               | <i>Calameuta haemorrhoidalis</i> Fabricius (female), <i>Calameuta pallipes</i> Klug, <i>Cephus nigrinus</i> C. G. Thomson, <i>Janus femoratus</i> Curtis, <i>Janus luteipes</i> Lepeletier                                                                                                                                                                                                                                                                                                                                                                                                                                                                | 5   | 4 | Hymenoptera | Cephidae         | 1  |
| The ruby tailed wasps                 | Chrysididae spp.                                                                                                                                                                                                                                                                                                                                                                                                                                                                                                                                                                                                                                          | 121 | 2 | Hymenoptera | Chrysididae      | 15 |
|                                       | <i>Colletes</i> spp.                                                                                                                                                                                                                                                                                                                                                                                                                                                                                                                                                                                                                                      | 23  | 5 | Hymenoptera | Colletidae       | 17 |
| The gasteruptiid wasps                | <i>Gasteruption</i> spp.                                                                                                                                                                                                                                                                                                                                                                                                                                                                                                                                                                                                                                  | 16  | 5 | Hymenoptera | Gasteruptionidae | 24 |
|                                       | <i>Coelioxys</i> spp., <i>Dioxys</i> spp.                                                                                                                                                                                                                                                                                                                                                                                                                                                                                                                                                                                                                 | 23  | 3 | Hymenoptera | Megachilidae     | 6  |
|                                       | <i>Dasyroda hirtipes</i> Fabricius (female)                                                                                                                                                                                                                                                                                                                                                                                                                                                                                                                                                                                                               | 1   | 7 | Hymenoptera | Melittidae       | 2  |
| The sapygid wasps                     | Sapygidae spp.                                                                                                                                                                                                                                                                                                                                                                                                                                                                                                                                                                                                                                            | 7   | 2 | Hymenoptera | Sapygidae        | 3  |
| The scoliid wasps with a yellow patch | <i>Megascolia maculata</i> Drury (male), <i>Scolia</i> spp.                                                                                                                                                                                                                                                                                                                                                                                                                                                                                                                                                                                               | 6   | 4 | Hymenoptera | Scoliidae        | 14 |
| The black and yellow mud dauber       | <i>Sceliphron caementarium</i> Drury                                                                                                                                                                                                                                                                                                                                                                                                                                                                                                                                                                                                                      | 1   | 7 | Hymenoptera | Sphecidae        | 4  |
| The Ammophila digger wasps and others | <i>Ammophila</i> spp., <i>Hoplammophila</i> spp.                                                                                                                                                                                                                                                                                                                                                                                                                                                                                                                                                                                                          | 10  | 3 | Hymenoptera | Sphecidae        | 4  |
| The Bembix digger wasps               | <i>Bembix</i> spp.                                                                                                                                                                                                                                                                                                                                                                                                                                                                                                                                                                                                                                        | 8   | 5 | Hymenoptera | Sphecidae        | 4  |
|                                       | <i>Chilosphex argyrius</i> Brullé (female), <i>Sphex pruinosus</i> Germar (female), <i>Isodontia splendidula</i> A. Costa (female), <i>Prionyx lividocinctus</i> A. Costa (female), <i>Sphex flavipennis</i> Fabricius (female), <i>Sphex funerarius</i> Gussakovskij (female), <i>Palmodes occitanicus</i> Lepeletier & Serville (female), <i>Palmodes strigulosus</i> A. Costa (female), <i>Podalonia affinis</i> W. Kirby (female), <i>Podalonia alpina</i> Kohl (female), <i>Podalonia fera</i> Lepeletier (female), <i>Podalonia hirsuta</i> Scopoli (female), <i>Podalonia luffii</i> Saunders (female), <i>Podalonia tydei</i> Le Guillou (female) | 14  | 4 | Hymenoptera | Sphecidae        | 14 |
|                                       | <i>Chilosphex argyrius</i> Brullé (male), <i>Sphex pruinosus</i> Germar (male), <i>Chalybion femoratum</i> Fabricius (male), <i>Chalybion flebile</i> Lepeletier (male), <i>Isodontia paludosa</i> Rossi (male), <i>Podalonia hirsuta</i> Radoszkowski (male), <i>Prionyx subfuscatus</i> Dahlbom (male), <i>Sphex atopilosus</i> Kohl (male), <i>Sphex leuconotus</i> Brullé (male)                                                                                                                                                                                                                                                                      | 9   | 4 | Hymenoptera | Sphecidae        | 8  |
|                                       | <i>Athalia rosae</i> Linnaeus                                                                                                                                                                                                                                                                                                                                                                                                                                                                                                                                                                                                                             | 1   | 7 | Hymenoptera | Tenthredinidae   | 1  |
|                                       | <i>Allantus laticinctus</i> Serville, <i>Allantus rufocinctus</i> Retzius, <i>Allantus calceatus</i> Klug, <i>Dolerus</i> spp., <i>Macrophya annulata</i> Geoffroy, <i>Macrophya blanda</i> Fabricius, <i>Macrophya rufipes</i> Linnaeus (male), <i>Tenthredo campestris</i> Linnaeus                                                                                                                                                                                                                                                                                                                                                                     | 52  | 4 | Hymenoptera | Tenthredinidae   | 10 |

|                            |                                                                                                                                                                                                                                                                                                                                                                                                                                                                                                                                                                                                                                                                                                                                                                                                                                                                                                                                                                                                                                                             |     |   |             |                |    |
|----------------------------|-------------------------------------------------------------------------------------------------------------------------------------------------------------------------------------------------------------------------------------------------------------------------------------------------------------------------------------------------------------------------------------------------------------------------------------------------------------------------------------------------------------------------------------------------------------------------------------------------------------------------------------------------------------------------------------------------------------------------------------------------------------------------------------------------------------------------------------------------------------------------------------------------------------------------------------------------------------------------------------------------------------------------------------------------------------|-----|---|-------------|----------------|----|
|                            | <i>Macrophya albicincta</i> Schrank, <i>Macrophya albipuncta</i> Fallén, <i>Macrophya alboannulata</i> A. Costa, <i>Macrophya carinthiaca</i> Klug                                                                                                                                                                                                                                                                                                                                                                                                                                                                                                                                                                                                                                                                                                                                                                                                                                                                                                          | 4   | 6 | Hymenoptera | Tenthredinidae | 3  |
|                            | <i>Allantus basalis</i> Klug (female), <i>Allantus cinctus</i> Linnaeus (female), <i>Allantus cingillum</i> Klug (female), <i>Allantus cingulatus</i> Scopoli (female), <i>Allantus togatus</i> Panzer, <i>Allantus truncatus</i> Klug (female), <i>Tenthredo koehlerii</i> Klug                                                                                                                                                                                                                                                                                                                                                                                                                                                                                                                                                                                                                                                                                                                                                                            | 7   | 4 | Hymenoptera | Tenthredinidae | 2  |
|                            | <i>Aglaostigma aucupariae</i> Klug, <i>Aglaostigma fulvipes</i> Scopoli, <i>Macrophya rufipes</i> Linnaeus (female), <i>Tenthredopsis</i> spp.                                                                                                                                                                                                                                                                                                                                                                                                                                                                                                                                                                                                                                                                                                                                                                                                                                                                                                              | 14  | 4 | Hymenoptera | Tenthredinidae | 2  |
|                            | <i>Tenthredo mesomela</i> Linnaeus, <i>Tenthredo mioceras</i> Enslin, <i>Tenthredo obsoleta</i> Klug, <i>Tenthredo olivacea</i> Klug                                                                                                                                                                                                                                                                                                                                                                                                                                                                                                                                                                                                                                                                                                                                                                                                                                                                                                                        | 4   | 6 | Hymenoptera | Tenthredinidae | 1  |
|                            | <i>Tiphia femorata</i> Fabricius                                                                                                                                                                                                                                                                                                                                                                                                                                                                                                                                                                                                                                                                                                                                                                                                                                                                                                                                                                                                                            | 1   | 7 | Hymenoptera | Tiphiidae      | 5  |
|                            | <i>Meria</i> spp., <i>Myzinum</i> spp.                                                                                                                                                                                                                                                                                                                                                                                                                                                                                                                                                                                                                                                                                                                                                                                                                                                                                                                                                                                                                      | 3   | 3 | Hymenoptera | Tiphiidae      | 1  |
|                            | <i>Delta unguiculatum</i> Villers                                                                                                                                                                                                                                                                                                                                                                                                                                                                                                                                                                                                                                                                                                                                                                                                                                                                                                                                                                                                                           | 1   | 7 | Hymenoptera | Vespidae       | 3  |
| The asian hornet           | <i>Vespa velutina</i> Lepeletier                                                                                                                                                                                                                                                                                                                                                                                                                                                                                                                                                                                                                                                                                                                                                                                                                                                                                                                                                                                                                            | 1   | 7 | Hymenoptera | Vespidae       | 6  |
| The hornet                 | <i>Vespa crabro</i> Linnaeus                                                                                                                                                                                                                                                                                                                                                                                                                                                                                                                                                                                                                                                                                                                                                                                                                                                                                                                                                                                                                                | 1   | 7 | Hymenoptera | Vespidae       | 19 |
|                            | Adelidae spp.                                                                                                                                                                                                                                                                                                                                                                                                                                                                                                                                                                                                                                                                                                                                                                                                                                                                                                                                                                                                                                               | 33  | 4 | Lepidoptera | Adelidae       | 9  |
|                            | <i>Pyrausta ostrinalis</i> Hübner, <i>Pyrausta purpuralis</i> Linnaeus                                                                                                                                                                                                                                                                                                                                                                                                                                                                                                                                                                                                                                                                                                                                                                                                                                                                                                                                                                                      | 2   | 5 | Lepidoptera | Crambidae      | 9  |
| The jersey tiger           | <i>Euplagia quadripunctaria</i> Poda                                                                                                                                                                                                                                                                                                                                                                                                                                                                                                                                                                                                                                                                                                                                                                                                                                                                                                                                                                                                                        | 1   | 7 | Lepidoptera | Erebidae       | 7  |
| The scarlet tiger          | <i>Callimorpha dominula</i> Linnaeus                                                                                                                                                                                                                                                                                                                                                                                                                                                                                                                                                                                                                                                                                                                                                                                                                                                                                                                                                                                                                        | 1   | 7 | Lepidoptera | Erebidae       | 1  |
|                            | <i>Eilema</i> spp.                                                                                                                                                                                                                                                                                                                                                                                                                                                                                                                                                                                                                                                                                                                                                                                                                                                                                                                                                                                                                                          | 11  | 5 | Lepidoptera | Erebidae       | 10 |
|                            | <i>Idaea aureolaria</i> Denis & Schiffermüller                                                                                                                                                                                                                                                                                                                                                                                                                                                                                                                                                                                                                                                                                                                                                                                                                                                                                                                                                                                                              | 1   | 7 | Lepidoptera | Geometridae    | 1  |
| The yellow shell           | <i>Camptogramma bilineata</i> Linnaeus                                                                                                                                                                                                                                                                                                                                                                                                                                                                                                                                                                                                                                                                                                                                                                                                                                                                                                                                                                                                                      | 1   | 7 | Lepidoptera | Geometridae    | 2  |
| The bloodvein              | <i>Timandra comae</i> Schmidt                                                                                                                                                                                                                                                                                                                                                                                                                                                                                                                                                                                                                                                                                                                                                                                                                                                                                                                                                                                                                               | 1   | 7 | Lepidoptera | Geometridae    | 2  |
| The latticed heath         | <i>Chiasmia clathrata</i> Linnaeus                                                                                                                                                                                                                                                                                                                                                                                                                                                                                                                                                                                                                                                                                                                                                                                                                                                                                                                                                                                                                          | 1   | 7 | Lepidoptera | Geometridae    | 2  |
| The chimney sweeper        | <i>Odezia atrata</i> Linnaeus                                                                                                                                                                                                                                                                                                                                                                                                                                                                                                                                                                                                                                                                                                                                                                                                                                                                                                                                                                                                                               | 1   | 7 | Lepidoptera | Geometridae    | 1  |
| The yellow banded          | <i>Psodos quadrifaria</i> Sulzer                                                                                                                                                                                                                                                                                                                                                                                                                                                                                                                                                                                                                                                                                                                                                                                                                                                                                                                                                                                                                            | 1   | 7 | Lepidoptera | Geometridae    | 1  |
| The geometer moths         | Geometridae spp. (except <i>Abraxas sylvata</i> Scopoli, <i>Abraxas grossulariata</i> Linnaeus, <i>Angerona prunaria</i> Linnaeus, <i>Aplocera</i> spp., <i>Archiearis parthenias</i> Linnaeus, <i>Aspitates gilvaria</i> Denis & Schiffermüller, <i>Aspitates ochrearia</i> Rossi, <i>Baptria tibiale</i> Esper, <i>Boudinotiana notha</i> Hübner, <i>Boudinotiana touranginii</i> Berce, <i>Camptogramma bilineata</i> Linnaeus, <i>Chiasmia clathrata</i> Linnaeus, <i>Chloroclystis v-ata</i> Haworth, <i>Cidaria fulvata</i> Forster, <i>Ennomos</i> spp., <i>Eupithecia</i> spp., <i>Gagitodes sagittata</i> Fabricius, <i>Gymnoscelis rufifasciata</i> Haworth, <i>Idaea aureolaria</i> Denis & Schiffermüller, <i>Idaea muricata</i> Hufnagel, <i>Odezia atrata</i> Linnaeus, <i>Opisthograptis luteolata</i> Linnaeus, <i>Ourapteryx sambucaria</i> Linnaeus, <i>Pasiphila</i> spp., <i>Pseudopanthera macularia</i> Linnaeus, <i>Psodos quadrifaria</i> Sulzer, <i>Selenia</i> spp., <i>Siona lineata</i> Scopoli, <i>Timandra comae</i> Schmidt) | 459 | 2 | Lepidoptera | Geometridae    | 4  |
| The silver-spotted skipper | <i>Hesperia comma</i> Linnaeus                                                                                                                                                                                                                                                                                                                                                                                                                                                                                                                                                                                                                                                                                                                                                                                                                                                                                                                                                                                                                              | 1   | 7 | Lepidoptera | Hesperiidae    | 1  |

|                                                       |                                                                                                                                                                                                                                                                                                                                                                                                                                                                                                                                                                                                                                |    |   |             |                 |    |
|-------------------------------------------------------|--------------------------------------------------------------------------------------------------------------------------------------------------------------------------------------------------------------------------------------------------------------------------------------------------------------------------------------------------------------------------------------------------------------------------------------------------------------------------------------------------------------------------------------------------------------------------------------------------------------------------------|----|---|-------------|-----------------|----|
| The brown skippers                                    | <i>Carcharodus alceae</i> Esper, <i>Carcharodus boeticus</i> Rambur, <i>Carcharodus floccifera</i> Zella, <i>Carcharodus lavatherae</i> Esper, <i>Erynnis tages</i> Linnaeus, <i>Muschampia proto</i> Ochsenheimer, <i>Pyrgus andromedae</i> Wallengren, <i>Pyrgus armoricanus</i> Oberthür, <i>Pyrgus bellieri</i> Oberthür, <i>Pyrgus cacaliae</i> Rambur, <i>Pyrgus carlinae</i> Rambur, <i>Pyrgus carthami</i> Hübner, <i>Pyrgus cirsii</i> Rambur, <i>Pyrgus malvae</i> Linnaeus, <i>Pyrgus onopordi</i> Rambur, <i>Pyrgus serratulae</i> Rambur, <i>Pyrgus warrenensis</i> Verity, <i>Spialia sertorius</i> Hoffmannsegg | 18 | 4 | Lepidoptera | Hesperiidae     | 16 |
| The sooty copper (male)                               | <i>Lycaena tityrus</i> Poda (male)                                                                                                                                                                                                                                                                                                                                                                                                                                                                                                                                                                                             | 1  | 7 | Lepidoptera | Lycaenidae      | 2  |
| The holly blue                                        | <i>Celastrina argiolus</i> Linnaeus (female)                                                                                                                                                                                                                                                                                                                                                                                                                                                                                                                                                                                   | 1  | 7 | Lepidoptera | Lycaenidae      | 3  |
| The baton blue                                        | <i>Pseudophilotes baton</i> Bergsträsser (male)                                                                                                                                                                                                                                                                                                                                                                                                                                                                                                                                                                                | 1  | 7 | Lepidoptera | Lycaenidae      | 1  |
| The geranium bronze                                   | <i>Cacyreus marshalli</i> Butler                                                                                                                                                                                                                                                                                                                                                                                                                                                                                                                                                                                               | 1  | 7 | Lepidoptera | Lycaenidae      | 9  |
| The small copper                                      | <i>Lycaena phlaeas</i> Linnaeus                                                                                                                                                                                                                                                                                                                                                                                                                                                                                                                                                                                                | 1  | 7 | Lepidoptera | Lycaenidae      | 22 |
| The scarce copper                                     | <i>Lycaena virgaurea</i> Linnaeus (male)                                                                                                                                                                                                                                                                                                                                                                                                                                                                                                                                                                                       | 1  | 7 | Lepidoptera | Lycaenidae      | 2  |
| The large copper                                      | <i>Lycaena dispar</i> Haworth (male)                                                                                                                                                                                                                                                                                                                                                                                                                                                                                                                                                                                           | 1  | 7 | Lepidoptera | Lycaenidae      | 1  |
| The purple-edged copper                               | <i>Lycaena hippothoe</i> Linnaeus (male)                                                                                                                                                                                                                                                                                                                                                                                                                                                                                                                                                                                       | 1  | 7 | Lepidoptera | Lycaenidae      | 1  |
|                                                       | <i>Satyrium w-album</i> Knoch                                                                                                                                                                                                                                                                                                                                                                                                                                                                                                                                                                                                  | 1  | 7 | Lepidoptera | Lycaenidae      | 1  |
|                                                       | <i>Satyrium spini</i> Denis & Schiffermüller                                                                                                                                                                                                                                                                                                                                                                                                                                                                                                                                                                                   | 1  | 7 | Lepidoptera | Lycaenidae      | 2  |
|                                                       | <i>Neozephyrus quercus</i> Linnaeus                                                                                                                                                                                                                                                                                                                                                                                                                                                                                                                                                                                            | 1  | 7 | Lepidoptera | Lycaenidae      | 1  |
|                                                       | <i>Satyrium pruni</i> Linnaeus                                                                                                                                                                                                                                                                                                                                                                                                                                                                                                                                                                                                 | 1  | 7 | Lepidoptera | Lycaenidae      | 2  |
| The males of holly blue and others                    | <i>Celastrina argiolus</i> Linnaeus (male), <i>Cupido alcetas</i> Hoffmannsegg (male), <i>Cupido osiris</i> Meigen (male), <i>Glaucopsyche iolas</i> Ochsenheimer (male), <i>Polyommatus daphnis</i> Denis & Schiffermüller (male), <i>Polyommatus semiargus</i> Rottemburg (male)                                                                                                                                                                                                                                                                                                                                             | 6  | 4 | Lepidoptera | Lycaenidae      | 13 |
| The long-tailed blue and the Lang's short-tailed blue | <i>Lampides boeticus</i> Linnaeus, <i>Leptotes pirithous</i> Linnaeus                                                                                                                                                                                                                                                                                                                                                                                                                                                                                                                                                          | 2  | 3 | Lepidoptera | Lycaenidae      | 3  |
| The purple-shot copper and others                     | <i>Lycaena alciphron</i> Rottemburg, <i>Lycaena dispar</i> Haworth (female), <i>Lycaena helle</i> Denis & Schiffermüller (female), <i>Lycaena hippothoe</i> Linnaeus (female), <i>Lycaena tityrus</i> Poda (female)                                                                                                                                                                                                                                                                                                                                                                                                            | 5  | 6 | Lepidoptera | Lycaenidae      | 6  |
| The damon blue and others                             | <i>Polyommatus damon</i> Denis & Schiffermüller, <i>Polyommatus dolus</i> Hübner, <i>Polyommatus ripartii</i> Freyer                                                                                                                                                                                                                                                                                                                                                                                                                                                                                                           | 3  | 6 | Lepidoptera | Lycaenidae      | 2  |
| The sloe hairstreak and others                        | <i>Satyrium acaciae</i> Fabricius, <i>Satyrium esculi</i> Hübner, <i>Satyrium ilicis</i> Esper                                                                                                                                                                                                                                                                                                                                                                                                                                                                                                                                 | 3  | 6 | Lepidoptera | Lycaenidae      | 13 |
| The green hairstreaks                                 | <i>Callophrys avis</i> Chapman, <i>Callophrys rubi</i> Linnaeus                                                                                                                                                                                                                                                                                                                                                                                                                                                                                                                                                                | 2  | 6 | Lepidoptera | Lycaenidae      | 1  |
|                                                       | <i>Micropterix</i> spp.                                                                                                                                                                                                                                                                                                                                                                                                                                                                                                                                                                                                        | 14 | 5 | Lepidoptera | Micropterigidae | 1  |
| The spotted sulphur                                   | <i>Acontia trabealis</i> Scopoli                                                                                                                                                                                                                                                                                                                                                                                                                                                                                                                                                                                               | 1  | 7 | Lepidoptera | Noctuidae       | 6  |



|                             |                                                                                                                                                                                                                                                                                                                                                                                                                                                                                                                                                                                                                                                                                                                                                                                                                                                                                                                                                                                                                                                                                                                                                                                                                                                                                           |    |   |             |             |    |
|-----------------------------|-------------------------------------------------------------------------------------------------------------------------------------------------------------------------------------------------------------------------------------------------------------------------------------------------------------------------------------------------------------------------------------------------------------------------------------------------------------------------------------------------------------------------------------------------------------------------------------------------------------------------------------------------------------------------------------------------------------------------------------------------------------------------------------------------------------------------------------------------------------------------------------------------------------------------------------------------------------------------------------------------------------------------------------------------------------------------------------------------------------------------------------------------------------------------------------------------------------------------------------------------------------------------------------------|----|---|-------------|-------------|----|
| The treble lines            | <i>Charanyca trigrammica</i> Hufnagel                                                                                                                                                                                                                                                                                                                                                                                                                                                                                                                                                                                                                                                                                                                                                                                                                                                                                                                                                                                                                                                                                                                                                                                                                                                     | 1  | 7 | Lepidoptera | Noctuidae   | 1  |
| The silver Y and others     | <i>Abrostola agnorista</i> Dufay, <i>Abrostola asclepiadis</i> Denis & Schiffermüller, <i>Abrostola tripartita</i> Hufnagel, <i>Abrostola triplasia</i> Linnaeus, <i>Autographa aemula</i> Denis & Schiffermüller, <i>Autographa bractea</i> Denis & Schiffermüller, <i>Autographa gamma</i> Linnaeus, <i>Autographa jota</i> Linnaeus, <i>Autographa pulchrina</i> Haworth, <i>Chrysodeixis chalcites</i> Esper, <i>Ctenoplusia accentifera</i> Lefebvre, <i>Diachrysia chrysitis</i> Linnaeus, <i>Diachrysia chryson</i> Esper, <i>Diachrysia nadeja</i> Oberthür, <i>Diachrysia stenochrysis</i> Warren, <i>Euchalcia bellieri</i> Kirby, <i>Euchalcia modestoides</i> Poole, <i>Euchalcia variabilis</i> Piller, <i>Lamprotes c-aureum</i> Knoch, <i>Macdunnoughia confusa</i> Stephens, <i>Panchrysia aurea</i> Hübner, <i>Panchrysia v-argenteum</i> Esper, <i>Plusia festucae</i> Linnaeus, <i>Plusia putnami</i> Grote, <i>Polychrysia moneta</i> Fabricius, <i>Syngrapha ain</i> Hochenwarth, <i>Syngrapha devergens</i> Hübner, <i>Syngrapha hohenwarthi</i> Hochenwarth, <i>Syngrapha interrogationis</i> Linnaeus, <i>Thysanoplusia circumscripta</i> Freyer, <i>Thysanoplusia daubei</i> Boisduval, <i>Thysanoplusia orichalcea</i> Fabricius, <i>Trichoplusia ni</i> Hübner | 33 | 3 | Lepidoptera | Noctuidae   | 9  |
| The western marbled white   | <i>Melanargia occitanica</i> Esper                                                                                                                                                                                                                                                                                                                                                                                                                                                                                                                                                                                                                                                                                                                                                                                                                                                                                                                                                                                                                                                                                                                                                                                                                                                        | 1  | 7 | Lepidoptera | Nymphalidae | 1  |
| The spanish gatekeeper      | <i>Pyronia bathseba</i> Fabricius                                                                                                                                                                                                                                                                                                                                                                                                                                                                                                                                                                                                                                                                                                                                                                                                                                                                                                                                                                                                                                                                                                                                                                                                                                                         | 1  | 7 | Lepidoptera | Nymphalidae | 2  |
| The painted lady            | <i>Vanessa cardui</i> Linnaeus                                                                                                                                                                                                                                                                                                                                                                                                                                                                                                                                                                                                                                                                                                                                                                                                                                                                                                                                                                                                                                                                                                                                                                                                                                                            | 1  | 7 | Lepidoptera | Nymphalidae | 13 |
| The european map            | <i>Araschnia levana</i> Linnaeus                                                                                                                                                                                                                                                                                                                                                                                                                                                                                                                                                                                                                                                                                                                                                                                                                                                                                                                                                                                                                                                                                                                                                                                                                                                          | 1  | 7 | Lepidoptera | Nymphalidae | 5  |
| The glanville fritillary    | <i>Melitaea cinxia</i> Linnaeus                                                                                                                                                                                                                                                                                                                                                                                                                                                                                                                                                                                                                                                                                                                                                                                                                                                                                                                                                                                                                                                                                                                                                                                                                                                           | 1  | 7 | Lepidoptera | Nymphalidae | 6  |
| The spotted fritillary      | <i>Melitaea didyma</i> Esper                                                                                                                                                                                                                                                                                                                                                                                                                                                                                                                                                                                                                                                                                                                                                                                                                                                                                                                                                                                                                                                                                                                                                                                                                                                              | 1  | 7 | Lepidoptera | Nymphalidae | 10 |
| The small tortoiseshell     | <i>Aglais urticae</i> Linnaeus                                                                                                                                                                                                                                                                                                                                                                                                                                                                                                                                                                                                                                                                                                                                                                                                                                                                                                                                                                                                                                                                                                                                                                                                                                                            | 1  | 7 | Lepidoptera | Nymphalidae | 10 |
| The great banded grayling   | <i>Brintesia circe</i> Fabricius                                                                                                                                                                                                                                                                                                                                                                                                                                                                                                                                                                                                                                                                                                                                                                                                                                                                                                                                                                                                                                                                                                                                                                                                                                                          | 1  | 7 | Lepidoptera | Nymphalidae | 12 |
| The pearly heath and others | <i>Coenonympha arcania</i> Linnaeus, <i>Coenonympha darwiniana</i> Staudinger, <i>Coenonympha gardetta</i> de Prunner                                                                                                                                                                                                                                                                                                                                                                                                                                                                                                                                                                                                                                                                                                                                                                                                                                                                                                                                                                                                                                                                                                                                                                     | 3  | 6 | Lepidoptera | Nymphalidae | 4  |
| The marsh fritillary        | <i>Euphydryas aurinia</i> Rottemburg                                                                                                                                                                                                                                                                                                                                                                                                                                                                                                                                                                                                                                                                                                                                                                                                                                                                                                                                                                                                                                                                                                                                                                                                                                                      | 1  | 7 | Lepidoptera | Nymphalidae | 1  |
| The marbled white           | <i>Melanargia galatha</i> Linnaeus                                                                                                                                                                                                                                                                                                                                                                                                                                                                                                                                                                                                                                                                                                                                                                                                                                                                                                                                                                                                                                                                                                                                                                                                                                                        | 1  | 7 | Lepidoptera | Nymphalidae | 23 |
| The dusky heath             | <i>Coenonympha dorus</i> Esper                                                                                                                                                                                                                                                                                                                                                                                                                                                                                                                                                                                                                                                                                                                                                                                                                                                                                                                                                                                                                                                                                                                                                                                                                                                            | 1  | 7 | Lepidoptera | Nymphalidae | 2  |
| The knapweed fritillary     | <i>Melitaea phoebe</i> Denis & Schiffermüller                                                                                                                                                                                                                                                                                                                                                                                                                                                                                                                                                                                                                                                                                                                                                                                                                                                                                                                                                                                                                                                                                                                                                                                                                                             | 1  | 7 | Lepidoptera | Nymphalidae | 1  |
| The dark green fritillary   | <i>Argynnis aglaja</i> Linnaeus                                                                                                                                                                                                                                                                                                                                                                                                                                                                                                                                                                                                                                                                                                                                                                                                                                                                                                                                                                                                                                                                                                                                                                                                                                                           | 1  | 7 | Lepidoptera | Nymphalidae | 1  |
| The dryad                   | <i>Minois dryas</i> Scopoli                                                                                                                                                                                                                                                                                                                                                                                                                                                                                                                                                                                                                                                                                                                                                                                                                                                                                                                                                                                                                                                                                                                                                                                                                                                               | 1  | 7 | Lepidoptera | Nymphalidae | 3  |
| The yellow-spotted ringlet  | <i>Erebia manto</i> Denis & Schiffermüller                                                                                                                                                                                                                                                                                                                                                                                                                                                                                                                                                                                                                                                                                                                                                                                                                                                                                                                                                                                                                                                                                                                                                                                                                                                | 1  | 7 | Lepidoptera | Nymphalidae | 1  |

|                                                  |                                                                                                                                                                                                                                                                                                                                                                                                                            |    |   |             |               |    |
|--------------------------------------------------|----------------------------------------------------------------------------------------------------------------------------------------------------------------------------------------------------------------------------------------------------------------------------------------------------------------------------------------------------------------------------------------------------------------------------|----|---|-------------|---------------|----|
| The queen of Spain fritillary                    | <i>Issoria lathonia</i> Linnaeus                                                                                                                                                                                                                                                                                                                                                                                           | 1  | 7 | Lepidoptera | Nymphalidae   | 7  |
| The commas                                       | <i>Polygonia</i> spp.                                                                                                                                                                                                                                                                                                                                                                                                      | 2  | 5 | Lepidoptera | Nymphalidae   | 23 |
| The walls                                        | <i>Lasiommata maera</i> Linnaeus, <i>Lasiommata megera</i> Linnaeus, <i>Lasiommata petropolitana</i> Fabricius                                                                                                                                                                                                                                                                                                             | 3  | 6 | Lepidoptera | Nymphalidae   | 16 |
| The silver-washed fritillary                     | <i>Argynnis paphia</i> Linnaeus                                                                                                                                                                                                                                                                                                                                                                                            | 1  | 7 | Lepidoptera | Nymphalidae   | 22 |
| The speckled wood                                | <i>Pararge aegeria</i> Linnaeus                                                                                                                                                                                                                                                                                                                                                                                            | 1  | 7 | Lepidoptera | Nymphalidae   | 11 |
| The ringlet                                      | <i>Aphantopus hyperantus</i> Linnaeus                                                                                                                                                                                                                                                                                                                                                                                      | 1  | 7 | Lepidoptera | Nymphalidae   | 2  |
| The red admiral                                  | <i>Vanessa atalanta</i> Linnaeus                                                                                                                                                                                                                                                                                                                                                                                           | 1  | 7 | Lepidoptera | Nymphalidae   | 34 |
| The false grayling and others                    | <i>Arethusana arethusa</i> Denis & Schiffermüller, <i>Chazara briseis</i> Linnaeus, <i>Hipparchia alcyone</i> Denis & Schiffermüller, <i>Hipparchia aristaeus</i> Bonelli, <i>Hipparchia fagi</i> Scopoli, <i>Hipparchia genava</i> Fruhstorffer, <i>Hipparchia neomiris</i> Godart, <i>Hipparchia semele</i> Linnaeus, <i>Hipparchia statilinus</i> Hufnagel, <i>Satyrus actea</i> Esper, <i>Satyrus ferula</i> Fabricius | 11 | 4 | Lepidoptera | Nymphalidae   | 3  |
| The chestnut heath and others                    | <i>Coenonympha glycerion</i> Borkhausen, <i>Coenonympha pamphilus</i> Linnaeus, <i>Coenonympha tullia</i> Müller                                                                                                                                                                                                                                                                                                           | 3  | 6 | Lepidoptera | Nymphalidae   | 13 |
| The scotch argus and others                      | <i>Erebia aethiops</i> Esper, <i>Erebia euryale</i> Esper, <i>Erebia ligea</i> Linnaeus                                                                                                                                                                                                                                                                                                                                    | 3  | 6 | Lepidoptera | Nymphalidae   | 2  |
| The false mnestra ringlet and others             | <i>Erebia aethiopella</i> Hoffmannsegg, <i>Erebia alberganus</i> Prunner, <i>Erebia epiphron</i> Knoch, <i>Erebia lefebvrei</i> Boisduval, <i>Erebia medusa</i> Denis & Schiffermüller, <i>Erebia melampus</i> Fuessly, <i>Erebia meolans</i> Prunner, <i>Erebia oeme</i> Hübner, <i>Erebia scipio</i> Boisduval, <i>Erebia sudetica</i> Staudinger, <i>Erebia triaria</i> Prunner                                         | 11 | 4 | Lepidoptera | Nymphalidae   | 1  |
| The white admirals                               | <i>Limenitis camilla</i> Linnaeus, <i>Limenitis reducta</i> Staudinger                                                                                                                                                                                                                                                                                                                                                     | 2  | 5 | Lepidoptera | Nymphalidae   | 9  |
| The swallowtail                                  | <i>Papilio machaon</i> Linnaeus                                                                                                                                                                                                                                                                                                                                                                                            | 1  | 7 | Lepidoptera | Papilionidae  | 14 |
| The cleopatra (male)                             | <i>Gonepteryx cleopatra</i> Linnaeus (male)                                                                                                                                                                                                                                                                                                                                                                                | 1  | 7 | Lepidoptera | Pieridae      | 1  |
| The black-veined white                           | <i>Aporia crataegi</i> Linnaeus                                                                                                                                                                                                                                                                                                                                                                                            | 1  | 7 | Lepidoptera | Pieridae      | 5  |
| The yellows                                      | <i>Colias</i> spp.                                                                                                                                                                                                                                                                                                                                                                                                         | 5  | 5 | Lepidoptera | Pieridae      | 18 |
| The cleopatra (female) and the brimstone         | <i>Gonepteryx cleopatra</i> Linnaeus (female), <i>Gonepteryx rhamni</i> Linnaeus                                                                                                                                                                                                                                                                                                                                           | 2  | 6 | Lepidoptera | Pieridae      | 19 |
| The wood whites                                  | <i>Leptidea</i> spp.                                                                                                                                                                                                                                                                                                                                                                                                       | 3  | 5 | Lepidoptera | Pieridae      | 1  |
| The orange tip and others                        | <i>Anthocharis cardamines</i> Linnaeus (female), <i>Anthocharis euphenoides</i> Staudinger (female), <i>Euchloe</i> spp., <i>Pontia</i> spp.                                                                                                                                                                                                                                                                               | 7  | 4 | Lepidoptera | Pieridae      | 2  |
| The dark-veined white and the green-veined white | <i>Pieris bryoniae</i> Hübner, <i>Pieris napi</i> Linnaeus                                                                                                                                                                                                                                                                                                                                                                 | 2  | 6 | Lepidoptera | Pieridae      | 6  |
| The plume moths                                  | <i>Pterophoridae</i> spp.                                                                                                                                                                                                                                                                                                                                                                                                  | 98 | 2 | Lepidoptera | Pterophoridae | 5  |

|                                  |                                            |    |   |             |            |    |
|----------------------------------|--------------------------------------------|----|---|-------------|------------|----|
| The clearwing moths              | <i>Sesiidae</i> spp.                       | 53 | 2 | Lepidoptera | Sesiidae   | 14 |
| The broad-bordered bee hawk-moth | <i>Hemaris fuciformis</i> Linnaeus         | 1  | 7 | Lepidoptera | Sphingidae | 14 |
|                                  | <i>Thyris fenestrella</i> Scopoli          | 1  | 7 | Lepidoptera | Thyridae   | 1  |
|                                  | <i>Zygaena lavandulae</i> Esper            | 1  | 7 | Lepidoptera | Zygaenidae | 1  |
| The common forester and others   | <i>Adscita</i> spp., <i>Jordanita</i> spp. | 11 | 3 | Lepidoptera | Zygaenidae | 4  |

---

The identity of the 223 infrequent taxa. Numbers in the “Taxonomic resolution” correspond to the following: 2 = a whole family, 3 = several genera within a family, 4 = species from different genera, 5 = a genus, 6 = species from a genus and 7 = a single species.
